# Supplementary material for: Comparative proteomic analysis of serum from nonhuman primates administered BIO 300: a promising radiation countermeasure
Source: PubMed Central journal article supplement (PMC7653926; doi:10.1038/s41598-020-76494-4), 2020-11-09
Supplement: 41598_2020_76494_MOESM1_ESM.pdf [file 41598_2020_76494_MOESM1_ESM.pdf]

**Comparative proteomic analysis of serum from nonhuman primates  
administered BIO 300, a promising radiation countermeasure**

Michael Girgis,<sup>1</sup> Yaoxiang Li,<sup>1</sup> Junfeng Ma,<sup>1</sup> Miloslav Sanda,<sup>1</sup> Stephen Y. Wise,<sup>2,3</sup> Oluseyi O.  
Fatanmi,<sup>2,3</sup> Michael D. Kaytor,<sup>4</sup> Amrita K Cheema,<sup>1,5</sup> and Vijay K Singh<sup>2,3\*</sup>

<sup>1</sup>Department of Oncology, Lombardi Comprehensive Cancer Center, Georgetown University  
Medical Center, Washington, DC, USA; <sup>2</sup>Division of Radioprotectants, Department of  
Pharmacology and Molecular Therapeutics, F. Edward Hébert School of Medicine,  
Uniformed Services University of the Health Sciences, Bethesda, MD, USA; <sup>3</sup>Armed Forces  
Radiobiology Research Institute, Uniformed Services University of the Health Sciences,  
Bethesda, MD, USA; <sup>4</sup>Humanetics Corporation, Edina, MN 55435, USA; <sup>5</sup>Department of  
Biochemistry, Molecular and Cellular Biology, Georgetown University Medical Center,  
Washington DC, USA.

1. **Supplementary Figure 1.** An overlay of QC spectra that were run throughout the entire sample set underscoring the reproducibility of data acquisition.



2. **Supplementary Figure 2.** PCA plot demonstrating the overall perturbation in proteins expression across all time points for both routes of administrations. These LC-MS data were searched against rhesus macaque database.

Supplementary Figure 2

Scores Plot

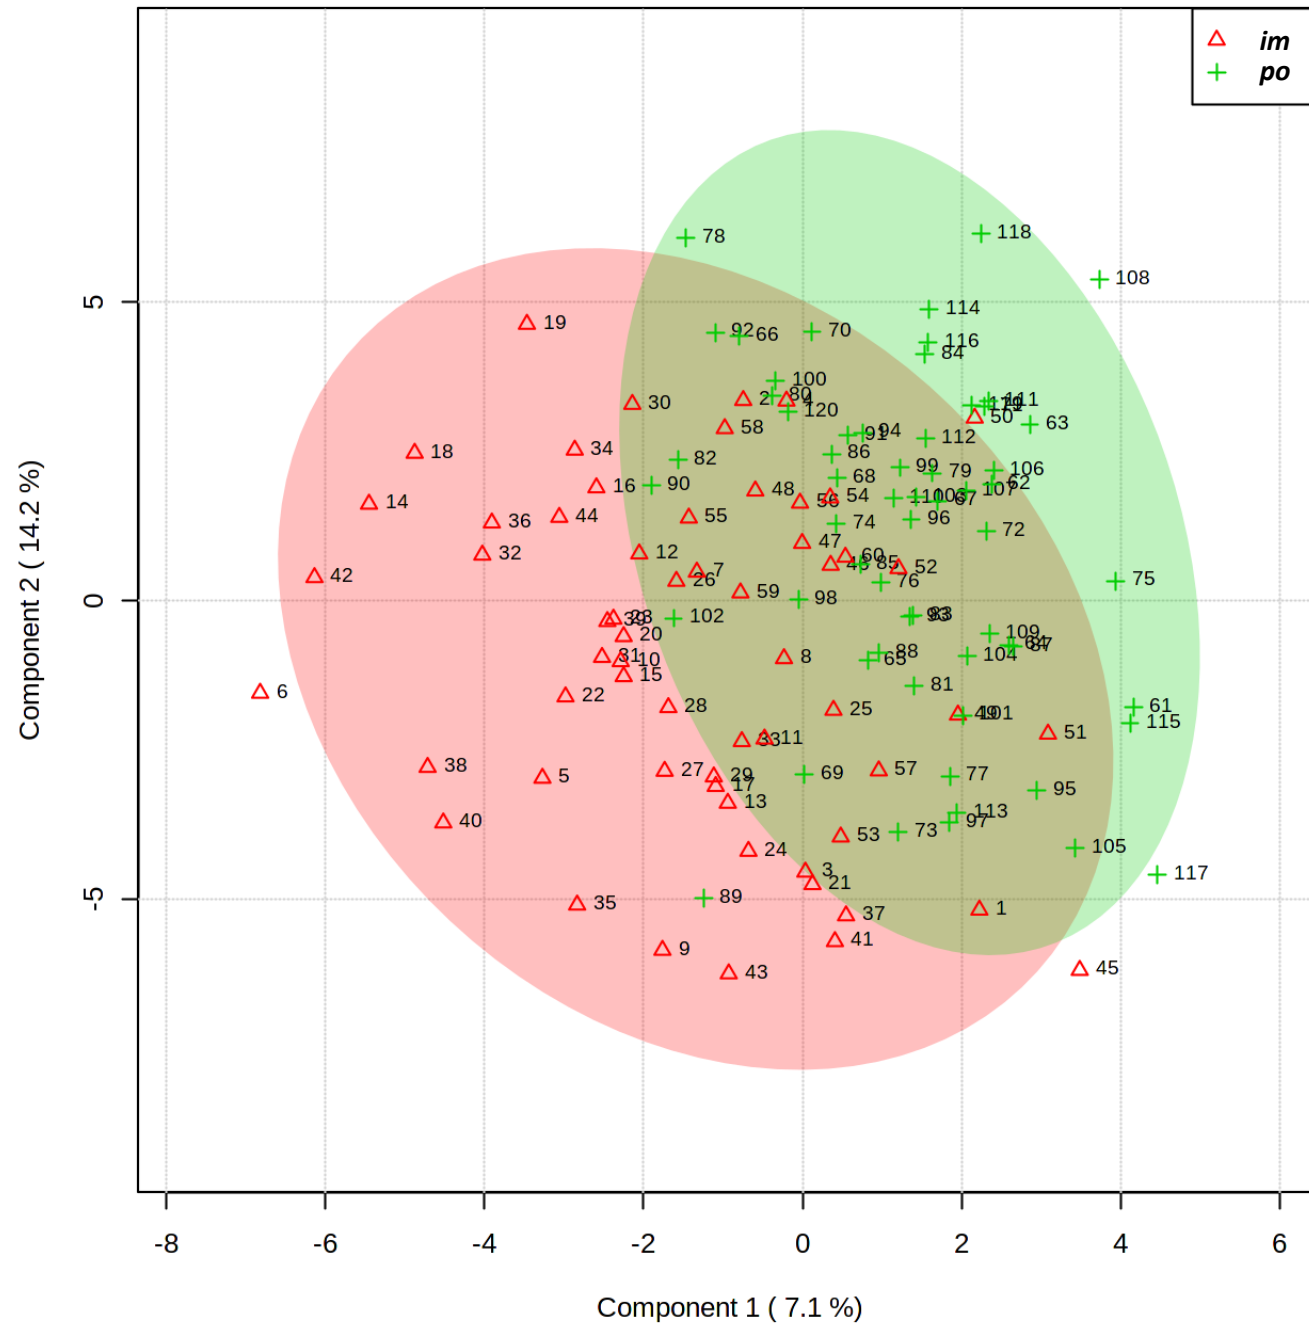

3. **Supplementary Figure 3.** Volcano plots illustrating significantly dysregulated proteins search results against Rhesus Macaque database that were selected on the basis of fold change (X-axis) and p-value (Y-axis) at one hour (panels A and D), two hours (panels B and E), and four hours post-drug administration (panels C and F) for both routes compared to pre-administration of the drug (t-1d).

# Supplementary Figure 3

● NS ● Log 2 fold-change ● P value ● P value & Log 2 fold-change

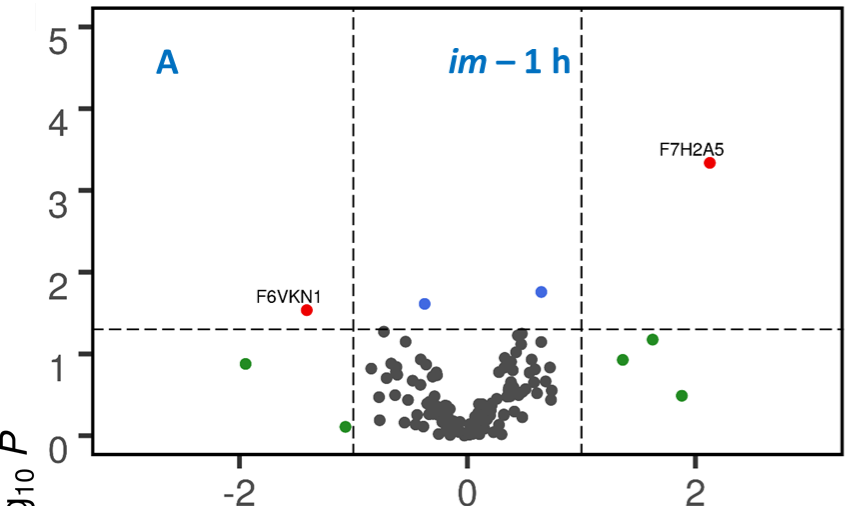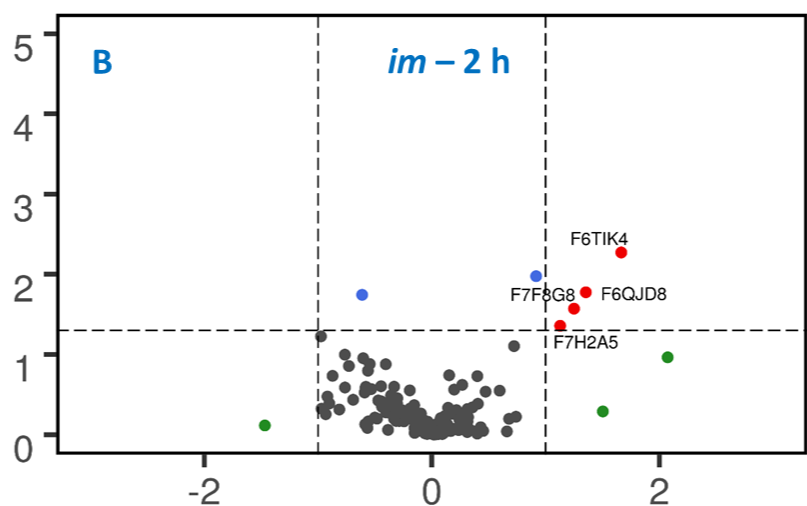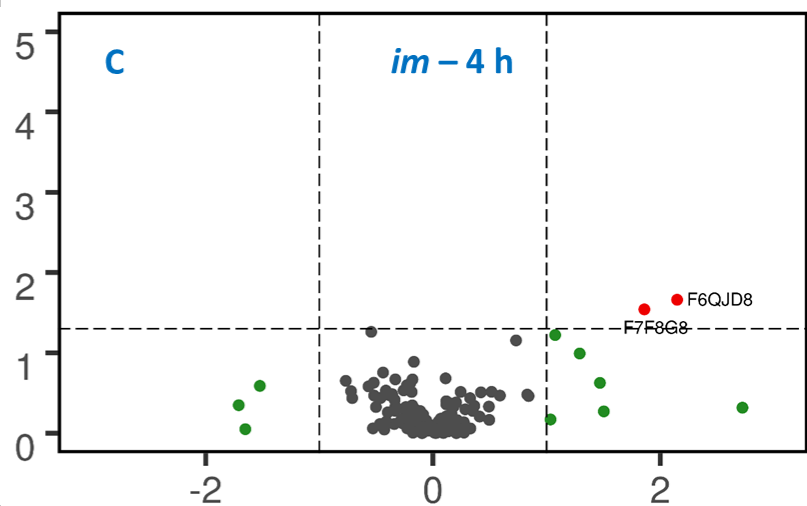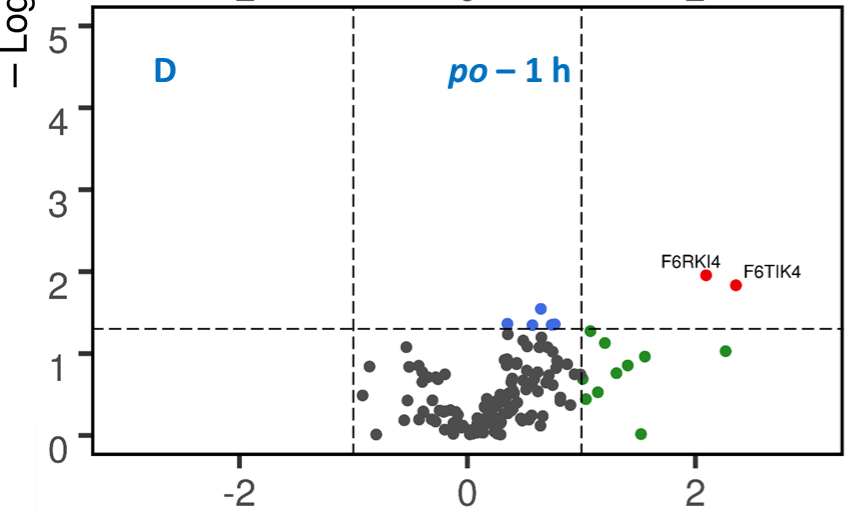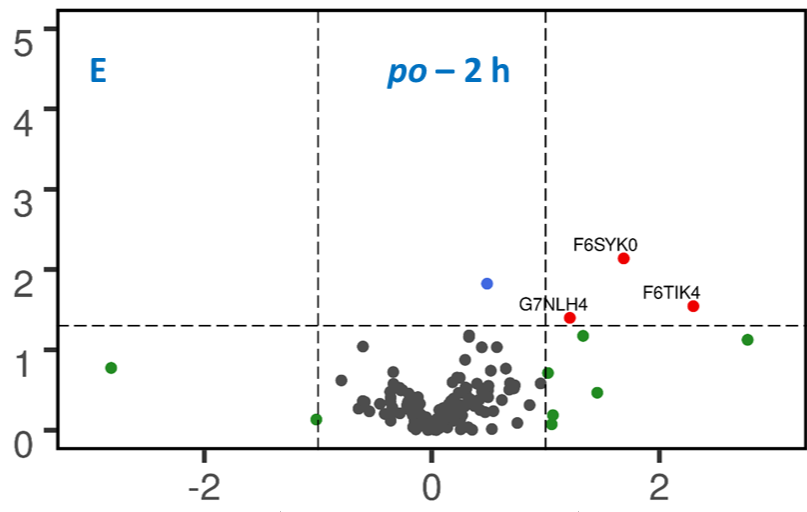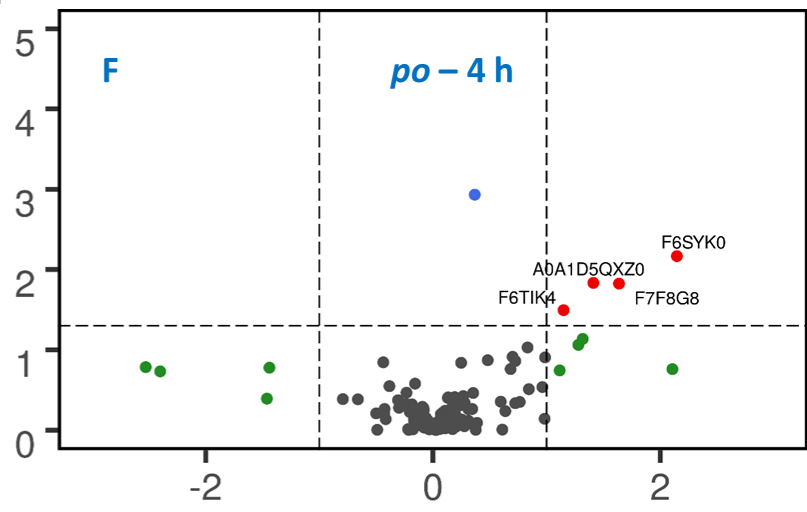

$\text{Log}_2$  fold change

4. **Supplementary Figure 4.** Heat map showing longitudinal dysregulations in the levels of selected proteins throughout 14 different time points in both routes of administration for BIO 300, as obtained from searching Rhesus Macaque database.





## Supplementary Tables

- 1. Supplementary Table 1:** contains a list of quantified protein names, their entry identifiers, the corresponding gene names and the length of their canonical sequence as obtained from the human database downloaded on 10/10/2019.
- 2. Supplementary Table 2:** contains a list of quantified proteins names, their entry identifiers, the corresponding gene names and the length of their canonical sequence as obtained from the rhesus macaque database downloaded on 10/11/2019.
- 3. Supplementary Table 3:** encompasses a list of quantified proteins comparing the *im* to *po* routes at each time point.
- 4. Supplementary Table 4:** encompasses a list of quantified proteins comparing the level of proteins as measured at each time point to that measured one hour prior to drug administration for the *im* route.
- 5. Supplementary Table 5:** encompasses a list of quantified proteins comparing the level of proteins as measured at each time point to that measured one hour prior to drug administration for the *po* route.
- 6. Supplementary Table 6:** the overall effect of drug administration on either route on the level of identified proteins. This comparison was established by dividing the protein level at each time point to the measure value one hour prior to drug administration.

Supplementary Table 1. Database match (Homo sapiens)

| Entry     | Entry name      | Status     | Protein names                                                                                                                                                              | Gene names                              | Organism                                         | Length |
|-----------|-----------------|------------|----------------------------------------------------------------------------------------------------------------------------------------------------------------------------|-----------------------------------------|--------------------------------------------------|--------|
| AA052Z25  | AA052Z25_HUMAN  | unreviewed | Apolipoprotein E isoform 1 (Fragment)                                                                                                                                      | APOE                                    | Homo sapiens (Human)                             | 317    |
| AA024R33  | AA024R33_HUMAN  | unreviewed | Apolipoprotein A-I, isoform CRA_a (Epididymis secretory sperm binding protein)                                                                                             | APOA1 HCG_41332                         | Homo sapiens (Human)                             | 267    |
| AA034ME1  | AA034ME1_HUMAN  | unreviewed | Epididymis secretory sperm binding protein                                                                                                                                 |                                         | Homo sapiens (Human)                             | 782    |
| V9HW93    | V9HW93_HUMAN    | unreviewed | Epididymis secretory protein L122 (Glutathione S-transferase pi, isoform CRA_b)                                                                                            | HEL-5-22 GSTP1 HCG_21055                | Homo sapiens (Human)                             | 210    |
| AA040K63  | AA040K63_HUMAN  | unreviewed | Testis tissue sperm binding protein L170a                                                                                                                                  |                                         | Homo sapiens (Human)                             | 418    |
| O94875    | SRB52_HUMAN     | reviewed   | Sorbin and SH3 domain-containing protein 2 (ArgBP2) (Arg/Abi-interacting protein 2) (Sorbin)                                                                               | SORBS2 ARGBP2 KIAA0777                  | Homo sapiens (Human)                             | 1100   |
| Q97HY3    | Q97HY3_HUMAN    | unreviewed | MOXD2 protein                                                                                                                                                              | MOXD2                                   | Homo sapiens (Human)                             | 303    |
| R2E781    | R2E781_HUMAN    | unreviewed | Flotillin-2 (EC 3.4.21.7)                                                                                                                                                  | HE2                                     | Homo sapiens (Human)                             | 810    |
| V9HW49    | V9HW49_HUMAN    | unreviewed | Epididymis secretory sperm binding protein L163p                                                                                                                           | HEL-5-63p                               | Homo sapiens (Human)                             | 1663   |
| V9HW58    | V9HW58_HUMAN    | unreviewed | Epididymis luminal protein 2                                                                                                                                               | HE2                                     | Homo sapiens (Human)                             | 255    |
| AA024R66  | AA024R66_HUMAN  | unreviewed | Adiponectin C (Complement component 1, q subcomponent, A chain, isoform CRA_a)                                                                                             | CT1QA ADC HCG_198179                    | Homo sapiens (Human)                             | 245    |
| AA06F0S1  | AA06F0S1_HUMAN  | unreviewed | Flaminogen (EC 3.4.21.7)                                                                                                                                                   | PLG                                     | Homo sapiens (Human)                             | 809    |
| V9HY11    | V9HY11_HUMAN    | unreviewed | Epididymis secretory sperm binding protein L170p                                                                                                                           | HEL-5-70p                               | Homo sapiens (Human)                             | 491    |
| Q9H2E1    | Q9H2E1_HUMAN    | unreviewed | Neutrophil                                                                                                                                                                 | NRP1 HCG_19074                          | Homo sapiens (Human)                             | 704    |
| Q5VY30    | Q5VY30_HUMAN    | unreviewed | Retinol binding protein                                                                                                                                                    | RBP4 HCG_37964                          | Homo sapiens (Human)                             | 199    |
| E9P7E3    | E9P7E3_HUMAN    | unreviewed | Prothrombin                                                                                                                                                                | F2                                      | Homo sapiens (Human)                             | 585    |
| D9ZG22    | D9ZG22_HUMAN    | unreviewed | Vitronectin                                                                                                                                                                | VTN                                     | Homo sapiens (Human)                             | 478    |
| Q5P099    | Q5P099_HUMAN    | unreviewed | C2 (Complement component 2, isoform CRA_b)                                                                                                                                 | C2 HCG_43694                            | Homo sapiens (Human)                             | 752    |
| Q5P091    | Q5P091_HUMAN    | unreviewed | Aminopeptidase (EC 3.4.11.1) (Fragment)                                                                                                                                    |                                         | Homo sapiens (Human)                             | 977    |
| Q8NB86    | Q8NB86_HUMAN    | unreviewed | Cholesteryl ester transfer protein                                                                                                                                         | CE3P                                    | Homo sapiens (Human)                             | 638    |
| H9BRP9    | H9BRP9_HUMAN    | unreviewed | Fibulin-1                                                                                                                                                                  | FBLN1                                   | Homo sapiens (Human)                             | 428    |
| V9HW90    | V9HW90_HUMAN    | unreviewed | Citronin (Protein)                                                                                                                                                         | HEL-5-92a APCS HCG_39427                | Homo sapiens (Human)                             | 223    |
| B2RAM6    | B2RAM6_HUMAN    | unreviewed | Protein S100 (S100 calcium-binding protein)                                                                                                                                |                                         | Homo sapiens (Human)                             | 114    |
| D6A364    | D6A364_HUMAN    | unreviewed | Hepatic cysteine growth factor activator                                                                                                                                   | HGFAC                                   | Homo sapiens (Human)                             | 662    |
| AA024R90  | AA024R90_HUMAN  | unreviewed | Thrombospondin 1, isoform CRA_a                                                                                                                                            | THBS1 HCG_178710                        | Homo sapiens (Human)                             | 1170   |
| D0PN11    | D0PN11_HUMAN    | unreviewed | Epididymis luminal protein 4 (Epididymis secretory protein L193) (Tyrosine 3-monooxygenase/tryptophan 5-monooxygenase activation protein, zeta polypeptide, isoform CRA_a) | YWH4Z HEL-5-3 HEL-5-93 HEL4 HCG_2099146 | Homo sapiens (Human)                             | 245    |
| Q9NYF3    | FAM5C_HUMAN     | reviewed   | Protein FAM5C                                                                                                                                                              | FAM5C C5orf5                            | Homo sapiens (Human)                             | 392    |
| V9WE33    | V9WE33_HUMAN    | unreviewed | Carbonic anhydrase 1, isoform CRA_a (Epididymis secretory protein L111) (Epididymis secretory sperm binding protein)                                                       | HEL-5-11 CA1 HCG_20883                  | Homo sapiens (Human)                             | 291    |
| C9EJ53    | C9EJ53_HUMAN    | unreviewed | Fibrinogen gamma chain                                                                                                                                                     | FGG                                     | Homo sapiens (Human)                             | 445    |
| M6Z298    | M6Z298_HUMAN    | unreviewed | N-acetylmuramidase 2L-variant (Fragment)                                                                                                                                   | PGLYR2P                                 | Homo sapiens (Human)                             | 447    |
| AA040K63  | AA040K63_HUMAN  | unreviewed | Alpha-2-macroglobulin                                                                                                                                                      | SERPINF2                                | Homo sapiens (Human)                             | 427    |
| AA040MR7  | AA040MR7_HUMAN  | unreviewed | Coagulation factor V                                                                                                                                                       | F5                                      | Homo sapiens (Human)                             | 2229   |
| B0TFC4    | B0TFC4_HUMAN    | unreviewed | Vitamin K-dependent protein Z variant 1                                                                                                                                    | PROZ                                    | Homo sapiens (Human)                             | 421    |
| E3UN46    | E3UN46_HUMAN    | unreviewed | Insulin-like growth factor II transcript variant 3 isoform 1 (Fragment)                                                                                                    | IGF2                                    | Homo sapiens (Human)                             | 109    |
| P748Z2    | P748Z2_HUMAN    | unreviewed | Inter-alpha-trypsin inhibitor (Fragment)                                                                                                                                   | ITIH                                    | Homo sapiens (Human)                             | 51     |
| B4E3P1    | B4E3P1_HUMAN    | unreviewed | cDNA FLJ5708, highly similar to Homo sapiens serpinovitin 2 (beta) (TPM2), transcript variant 2, mRNA                                                                      |                                         | Homo sapiens (Human)                             | 51     |
| Q96K68    | Q96K68_HUMAN    | unreviewed | cDNA FLJ14473, clone MAMMA1001080, highly similar to Homo sapiens SMC73 protein (SMC73) mRNA                                                                               |                                         | Homo sapiens (Human)                             | 494    |
| D1V411    | D1V411_HUMAN    | unreviewed | C-X-C motif chemokine (Fragment)                                                                                                                                           |                                         | Homo sapiens (Human)                             | 126    |
| B4RY10    | B4RY10_HUMAN    | unreviewed | cDNA FLJ5470, highly similar to Keratin, type II cytoskeletal 4E                                                                                                           |                                         | Homo sapiens (Human)                             | 547    |
| ASPL27    | ASPL27_HUMAN    | unreviewed | CP protein (Cephalopodin (Ferroxidase) (Cephalopodin, isoform CRA_a))                                                                                                      | CP HCG_1781201                          | Homo sapiens (Human)                             | 1065   |
| Q5H177    | Q5H177_HUMAN    | unreviewed | Calmodulin-like skin protein variant (Fragment)                                                                                                                            |                                         | Homo sapiens (Human)                             | 146    |
| B4E1C2    | B4E1C2_HUMAN    | unreviewed | Kinasee 1, isoform CRA_b (cDNA FLJ5506, highly similar to Kinasee 1)                                                                                                       | KNK1 HCG_2031397                        | Homo sapiens (Human)                             | 644    |
| V9HW58    | V9HW58_HUMAN    | unreviewed | Gluathione peroxidase                                                                                                                                                      | HEL-5-75 GPX5 HCG_22448                 | Homo sapiens (Human)                             | 221    |
| AA040P95  | AA040P95_HUMAN  | unreviewed | Alpha-2-macroglobulin (Fragment)                                                                                                                                           | SERPINF2                                | Homo sapiens (Human)                             | 255    |
| B4E1C7    | B4E1C7_HUMAN    | unreviewed | Protein kinase (EC 2.7.1.40)                                                                                                                                               |                                         | Homo sapiens (Human)                             | 511    |
| AA040Z45  | AA040Z45_HUMAN  | unreviewed | Complement factor properdin isoform 1 (Complement factor properdin, isoform CRA_d) (Fragment)                                                                              | CFP HCG_29138                           | Homo sapiens (Human)                             | 469    |
| H9WR11    | H9WR11_HUMAN    | unreviewed | Keratin 1                                                                                                                                                                  | KRT1                                    | Homo sapiens (Human)                             | 465    |
| F8W876    | F8W876_HUMAN    | unreviewed | Mannan-binding lectin serine protease 1                                                                                                                                    | MASP1                                   | Homo sapiens (Human)                             | 354    |
| B7Z555    | B7Z555_HUMAN    | unreviewed | cDNA FLJ5511, highly similar to C Complement component C8 beta chain                                                                                                       |                                         | Homo sapiens (Human)                             | 539    |
| AA034MD5  | AA034MD5_HUMAN  | unreviewed | Epididymis secretory sperm binding protein                                                                                                                                 |                                         | Homo sapiens (Human)                             | 539    |
| Q8VC09    | Q8VC09_HUMAN    | unreviewed | Serpin peptidase inhibitor, clade D (Heparin cofactor), member 1                                                                                                           | SERPIND1                                | Homo sapiens (Human)                             | 499    |
| L6D0R7    | L6D0R7_NE001    | unreviewed | Fermitin family member 3 (Fragment)                                                                                                                                        | F5H1C6                                  | Neovision vision (American mink) (Mustela vison) | 150    |
| L6D0R2    | L6D0R2_NE001    | unreviewed | Cysteine knot domain family 3, member H (Fragment)                                                                                                                         | PROZP2                                  | Neovision vision (American mink) (Mustela vison) | 127    |
| B3K579    | B3K579_HUMAN    | unreviewed | cDNA FLJ5750, clone TST200311, highly similar to ALPHA-1-ANTICHERYMOYRIN                                                                                                   |                                         | Homo sapiens (Human)                             | 448    |
| C0FY22    | C0FY22_HUMAN    | unreviewed | Apolipoprotein B (beta) (beta) (apolipoprotein, isoform CRA_a)                                                                                                             | APOB HCG_20088                          | Homo sapiens (Human)                             | 9363   |
| AA040MR9  | AA040MR9_HUMAN  | unreviewed | Serpin peptidase inhibitor, clade A (alpha-1 antitrypsin, antitrypsin, member 5, isoform CRA_a)                                                                            | SERPINA5 HCG_203091                     | Homo sapiens (Human)                             | 496    |
| A2RTV6    | A2RTV6_HUMAN    | unreviewed | Inter-alpha (Gly) inhibitor H2 (inter-alpha (Gly) inhibitor H2, isoform CRA_b)                                                                                             | TIH2 HCG_25115                          | Homo sapiens (Human)                             | 940    |
| D6F054    | D6F054_HUMAN    | unreviewed | Complement C1s subcomponent subunit B                                                                                                                                      | C1QB                                    | Homo sapiens (Human)                             | 251    |
| AA040ZP0  | AA040ZP0_HUMAN  | unreviewed | Complement C1s                                                                                                                                                             | C1A                                     | Homo sapiens (Human)                             | 1744   |
| G3V2W1    | G3V2W1_HUMAN    | unreviewed | Protein Z-dependent protease inhibitor (Serpin peptidase inhibitor, clade A (Alpha-1 antitrypsin, antitrypsin), member 10, isoform CRA_SERPINA10 HCG_22331)                |                                         | Homo sapiens (Human)                             | 484    |
| E2Z3V1    | E2Z3V1_HUMAN    | unreviewed | Capsase 14, apoptosis-related cysteine peptidase (Capsase-14) (cDNA, FLJ3644, Homo sapiens capspase 14, apoptosis-related cysteine peptidase) (CAPS14 HCG_38589)           |                                         | Homo sapiens (Human)                             | 242    |
| S4RY14    | S4RY14_HUMAN    | unreviewed | Protein AMBP                                                                                                                                                               | AMBP                                    | Homo sapiens (Human)                             | 238    |
| B1AP58    | B1AP58_HUMAN    | unreviewed | Carboxypeptidase N catalytic chain (Fragment)                                                                                                                              | CPN1                                    | Homo sapiens (Human)                             | 204    |
| AA040RA7  | AA040RA7_HUMAN  | unreviewed | Adiponectin B (Complement component 1, q subcomponent, C chain, isoform CRA_a)                                                                                             | CT1QC ADB HCG_3037016                   | Homo sapiens (Human)                             | 127    |
| IL145     | IL145_HUMAN     | unreviewed | Sex hormone-binding globulin (Sex hormone-binding globulin, isoform CRA_a)                                                                                                 | SHBG HCG_42018                          | Homo sapiens (Human)                             | 344    |
| D1P0P0    | D1P0P0_HUMAN    | unreviewed | Titin, isoform CRA_a                                                                                                                                                       | TTN HCG_206899                          | Homo sapiens (Human)                             | 3642   |
| R2AN22    | R2AN22_HUMAN    | unreviewed | cDNA, FLJ5914, highly similar to Homo sapiens vav1 1 (VAVN1), mRNA                                                                                                         |                                         | Homo sapiens (Human)                             | 511    |
| E9PFR0    | E9PFR0_HUMAN    | unreviewed | Totenectin                                                                                                                                                                 | CLEC3B                                  | Homo sapiens (Human)                             | 160    |
| AKK1K1    | AKK1K1_HUMAN    | unreviewed | cDNA FLJ5532, highly similar to Homo sapiens carnosine dipeptidase 1 (metallopeptidase MD0 family) (ACNDP1), mRNA                                                          |                                         | Homo sapiens (Human)                             | 507    |
| AA040VJ7  | AA040VJ7_HUMAN  | unreviewed | Testicular tissue protein L1 (t1)                                                                                                                                          |                                         | Homo sapiens (Human)                             | 540    |
| Q5P8P2    | Q5P8P2_HUMAN    | unreviewed | Angiotensinogen variant (Fragment)                                                                                                                                         |                                         | Homo sapiens (Human)                             | 491    |
| S4E1T1    | S4E1T1_HUMAN    | unreviewed | Protein AMBP (Fragment)                                                                                                                                                    | AMBP                                    | Homo sapiens (Human)                             | 103    |
| JK000     | JK000_HUMAN     | unreviewed | PEPD protein                                                                                                                                                               | PEPD                                    | Homo sapiens (Human)                             | 493    |
| H9YAC1    | H9YAC1_HUMAN    | unreviewed | Plasma kallikrein (Fragment)                                                                                                                                               | KLK10                                   | Homo sapiens (Human)                             | 298    |
| Q5R875    | Q5R875_HUMAN    | unreviewed | GLI3 gamma form                                                                                                                                                            | GLI3                                    | Homo sapiens (Human)                             | 117    |
| AA040VX0  | AA040VX0_HUMAN  | unreviewed | Testicular tissue protein L1227                                                                                                                                            |                                         | Homo sapiens (Human)                             | 686    |
| AA040ZLH4 | AA040ZLH4_HUMAN | unreviewed | Contextonin-binding globulin                                                                                                                                               |                                         | Homo sapiens (Human)                             | 405    |
| Q5T326    | Q5T326_HUMAN    | unreviewed | Alpha-amylase (EC 3.1.1.1) (Fragment)                                                                                                                                      |                                         | Homo sapiens (Human)                             | 511    |
| B7Z549    | B7Z549_HUMAN    | unreviewed | cDNA FLJ56821, highly similar to later-alpha-trypsin inhibitor heavy chain III                                                                                             |                                         | Homo sapiens (Human)                             | 677    |
| X6D9P6    | X6D9P6_HUMAN    | unreviewed | Transglutinin-2 (Fragment)                                                                                                                                                 | TAGLN2                                  | Homo sapiens (Human)                             | 187    |
| B4DVE1    | B4DVE1_HUMAN    | unreviewed | cDNA FLJ5470, highly similar to Galactose-3-binding protein                                                                                                                |                                         | Homo sapiens (Human)                             | 673    |
| B4DZ56    | B4DZ56_HUMAN    | unreviewed | cDNA FLJ5841, highly similar to Ataxin                                                                                                                                     |                                         | Homo sapiens (Human)                             | 1156   |
| B7ZK28    | B7ZK28_HUMAN    | unreviewed | TIH4 protein (inter-alpha-trypsin inhibitor heavy chain 14)                                                                                                                | TIH4                                    | Homo sapiens (Human)                             | 935    |
| Q9N1N6    | Q9N1N6_HUMAN    | unreviewed | Hemoglobin gamma-G (Fragment)                                                                                                                                              | HBG2                                    | Homo sapiens (Human)                             | 129    |
| Q5V1E7    | Q5V1E7_HUMAN    | unreviewed | Coagulation factor X (Coagulation factor X, isoform CRA_a) (cDNA, FLJ3415, Homo sapiens coagulation factor X (F10), mRNA)                                                  | F10 HCG_27879                           | Homo sapiens (Human)                             | 488    |
| AA040R05  | AA040R05_HUMAN  | unreviewed | Complement component 9, isoform CRA_a                                                                                                                                      | C9 HCG_37544                            | Homo sapiens (Human)                             | 2715   |
| F9W06     | F9W06_HUMAN     | unreviewed | Nucleosome assembly protein 1-like 1                                                                                                                                       | NAP1L1                                  | Homo sapiens (Human)                             | 559    |
| JKP41     | JKP41_HUMAN     | unreviewed | Cysteine-rich secretory protein 3                                                                                                                                          | CRISP3                                  | Homo sapiens (Human)                             | 276    |
| Q5K6G6    | Q5K6G6_HUMAN    | unreviewed | Beta actin variant (Fragment)                                                                                                                                              |                                         | Homo sapiens (Human)                             | 375    |
| V9HW68    | V9HW68_HUMAN    | unreviewed | Epididymis luminal protein 214                                                                                                                                             | HEL-214                                 | Homo sapiens (Human)                             | 470    |
| AA087XJ7  | AA087XJ7_HUMAN  | unreviewed | Keratin 14 (Epididymis/bulla simplex, Dowling-Mears, Koebner), isoform CRA_a                                                                                               | GPX3                                    | Homo sapiens (Human)                             | 229    |
| AA040R16  | AA040R16_HUMAN  | unreviewed | QSOX1 protein (Fragment)                                                                                                                                                   | KRT14AC1_205483                         | Homo sapiens (Human)                             | 261    |
| Q4E1E9    | Q4E1E9_HUMAN    | unreviewed | DSP variant protein (Fragment)                                                                                                                                             | DSP variant protein                     | Homo sapiens (Human)                             | 2319   |
| Q5J2D6    | Q5J2D6_HUMAN    | unreviewed | Transferrin variant (Fragment)                                                                                                                                             |                                         | Homo sapiens (Human)                             | 698    |
| AA024RBD1 | AA024RBD1_HUMAN | unreviewed | Auaustrinase III isoform                                                                                                                                                   |                                         | Homo sapiens (Human)                             | 95     |
| Q13784    | Q13784_HUMAN    | unreviewed | APOA4 protein (Fragment)                                                                                                                                                   | AT1H R2                                 | Homo sapiens (Human)                             | 244    |
| F5H1C6    | F5H1C6_HUMAN    | unreviewed | Fermitin family homolog 3 (Fragment)                                                                                                                                       | F5H1C6                                  | Homo sapiens (Human)                             | 286    |
| C9V7T7    | C9V7T7_HUMAN    | unreviewed | Alpha-2-HS-glycoprotein                                                                                                                                                    | AHS2                                    | Homo sapiens (Human)                             | 986    |
| Q9UE17    | Q9UE17_HUMAN    | unreviewed | Amine oxidase (EC 1.4.3.1) (Fragment)                                                                                                                                      |                                         | Homo sapiens (Human)                             | 64     |
| IL1E39    | IL1E39_HUMAN    | unreviewed | Profilin (Fragment)                                                                                                                                                        | PFN1                                    | Homo sapiens (Human)                             | 165    |
| B0TWK2    | B0TWK2_HUMAN    | unreviewed | Apolipoprotein C-III (Apolipoprotein C-III variant 1)                                                                                                                      | APOC3                                   | Homo sapiens (Human)                             | 117    |
| D9WP99    | D9WP99_HUMAN    | unreviewed | Beta-2-glycoprotein 1 (Fragment)                                                                                                                                           |                                         | Homo sapiens (Human)                             | 326    |
| E7SD86    | E7SD86_HUMAN    | unreviewed | Vitamin K-dependent protein C                                                                                                                                              | PROC                                    | Homo sapiens (Human)                             | 495    |
| FK068     | FK068_HUMAN     | unreviewed | Hemoglobin (Fragment)                                                                                                                                                      | HP                                      | Homo sapiens (Human)                             | 494    |
| Q04GZ2    | Q04GZ2_HUMAN    | unreviewed | Urchin-associated protein DKFZp680B0562 (Fragment)                                                                                                                         | DKFZp680B0562                           | Homo sapiens (Human)                             | 321    |
| AK8G24    | AK8G24_HUMAN    | unreviewed | cDNA FLJ7071, highly similar to Human MRC class III complement component C6 mRNA                                                                                           |                                         | Homo sapiens (Human)                             | 504    |
| H9YD6     | H9YD6_HUMAN     | unreviewed | Keratin, type II cytoskeletal 79 (Fragment)                                                                                                                                | KRT79                                   | Homo sapiens (Human)                             | 119    |
| A09071    | A09071_HUMAN    | unreviewed | Delta globin (Delta-globin chain) (Glycyl A2) (Hemoglobin delta) (Hemoglobin, delta)                                                                                       | HBB GLNA2 HCG_1641001                   | Homo sapiens (Human)                             | 147    |
| Q9S1F9    | Q9S1F9_HUMAN    | unreviewed | Epididymis secretory sperm binding protein (EPX protein) (Hemopexin)                                                                                                       | HPX                                     | Homo sapiens (Human)                             | 254    |
| Q5SGN8    | Q5SGN8_HUMAN    | unreviewed | Macrophage stimulating 1 (Hepatic cysteine growth factor-like) variant (Fragment)                                                                                          |                                         | Homo sapiens (Human)                             | 711    |
| Q6L4N8    | Q6L4N8_HUMAN    | unreviewed | Collyrin type 1 alpha 1 (Fragment)                                                                                                                                         | COL1A1                                  | Homo sapiens (Human)                             | 1099   |
| B4PQD     | B4PQD_HUMAN     | unreviewed | Complement C1s subcomponent (cDNA FLJ5471, highly similar to Complement C1s subcomponent)                                                                                  | C1S                                     | Homo sapiens (Human)                             | 719    |
| Q9CY22    | Q9CY22_HUMAN    | unreviewed | C8A protein (Fragment)                                                                                                                                                     | C8A                                     | Homo sapiens (Human)                             | 394    |
| E7Q364    | E7Q364_HUMAN    | unreviewed | Typosin-1                                                                                                                                                                  | PSS1                                    | Homo sapiens (Human)                             | 261    |
| AA040JHF1 | AA040JHF1_HUMAN | unreviewed | Mean serpin family A member 7                                                                                                                                              |                                         | Homo sapiens (Human)                             | 415    |
| V9HWF6    | V9HWF6_HUMAN    | unreviewed | Alpha-1-actin glycoprotein                                                                                                                                                 | HEL-5-15w                               | Homo sapiens (Human)                             | 203    |
| Q8YAT0    | Q8YAT0_HUMAN    | unreviewed | Insulin-like growth factor binding protein, acid labile subunit                                                                                                            | IGFBP5                                  | Homo sapiens (Human)                             | 615    |
| R2E771    | R2E771_HUMAN    | unreviewed | cDNA, FLJ5312, highly similar to Homo sapiens adipose most abundant gene transcript 1 (APM1), mRNA                                                                         |                                         | Homo sapiens (Human)                             | 244    |
| E9KL23    | E9KL23_HUMAN    | unreviewed | Epididymis secretory sperm binding protein L144a (Serpin peptidase inhibitor clade A member 1 isoform 1)                                                                   | SERPINA1                                | Homo sapiens (Human)                             | 418    |
| R3XN90    | R3XN90_HUMAN    | unreviewed | cDNA FLJ5621, clone CTG02201801, highly similar to Complement C1s subcomponent                                                                                             |                                         | Homo sapiens (Human)                             | 688    |
| D1DNN4    | D1DNN4_HUMAN    | unreviewed | Carboxylester hydrolase (EC 3.1.1.-)                                                                                                                                       | BCHE HCG_14822                          | Homo sapiens (Human)                             | 643    |
| F2RM45    | F2RM45_HUMAN    | unreviewed | Serine protease                                                                                                                                                            | factor IX F9                            | Homo sapiens (Human)                             | 461    |
| B4E9H4    | B4E9H4_HUMAN    | unreviewed | cDNA FLJ5878, highly similar to Flaminogen                                                                                                                                 |                                         | Homo sapiens (Human)                             | 407    |
| F8W7L3    | F8W7L3_HUMAN    | unreviewed | Alpha-2-macroglobulin (Fragment)                                                                                                                                           | AM2                                     | Homo sapiens (Human)                             | 168    |
| R2R88     | R2R88_HUMAN     | unreviewed | Monocyte differentiation antigen CD14 (Myeloid cell-specific locus-rich glycoprotein)                                                                                      | CD14                                    | Homo sapiens (Human)                             | 375    |
| AA040R14  | AA040R14_HUMAN  | unreviewed | Conasin 1, isoform CRA_a                                                                                                                                                   | CNTN1 HCG_3261                          | Homo sapiens (Human)                             | 1018   |
| R2B815    | R2B815_HUMAN    | unreviewed | cDNA, FLJ2695, highly similar to Homo sapiens serpin peptidase inhibitor, clade A (alpha-1 antitrypsin, antitrypsin), member 4                                             |                                         | Homo sapiens (Human)                             | 427    |
| F8V5V7    | F8V5V7_HUMAN    | unreviewed | (SERPINA4), mRNA                                                                                                                                                           | KRT5                                    | Homo sapiens (Human)                             | 132    |
| AA087W55  | AA087W55_HUMAN  | unreviewed | Keratin, type II cytoskeletal 5 (Fragment)                                                                                                                                 | CPB2                                    | Homo sapiens (Human)                             | 386    |
| B7Z525    | B7Z525_HUMAN    | unreviewed | cDNA FLJ5672, highly similar to Human serpin adipose most abundant gene transcript 2                                                                                       |                                         | Homo sapiens (Human)                             | 280    |
| Q5K6S8    | Q5K6S8_HUMAN    | unreviewed | Complement component 5 variant (Fragment)                                                                                                                                  |                                         | Homo sapiens (Human)                             | 1006   |
| AA03B866  | AA03B866_HUMAN  | unreviewed | Coagulation factor XIII B chain (Fragment)                                                                                                                                 | F13B                                    | Homo sapiens (Human)                             | 246    |
| Q5E4E3    | Q5E4E3_HUMAN    | unreviewed | Cathelin 5, type 2 (preproprotein variant (Fragment))                                                                                                                      |                                         | Homo sapiens (Human)                             | 407    |
| B3KT06    | B3KT06_HUMAN    | unreviewed | Tubulin alpha chain                                                                                                                                                        | PGA                                     | Homo sapiens (Human)                             | 416    |

Supplementary Table 2. Database match (Macaca mulatta)

| Entry     | Entry name      | Status     | Protein names                                                                           | Gene names          | Organism                        | Length |
|-----------|-----------------|------------|-----------------------------------------------------------------------------------------|---------------------|---------------------------------|--------|
| Q5NKV6    | ICAM1_MACMU     | reviewed   | Intercellular adhesion molecule 1 (ICAM-1) (CD antigen CD54)                            | ICAM1               | Macaca mulatta (Rhesus macaque) | 532    |
| DC3L7     | DC3L7_MACMU     | unreviewed | Apolipoprotein E                                                                        | APBIE               | Macaca mulatta (Rhesus macaque) | 317    |
| F0WY22    | F0WY22_MACMU    | unreviewed | Uncharacterized protein                                                                 | THRS1               | Macaca mulatta (Rhesus macaque) | 1173   |
| AA1D180B8 | AA1D180B8_MACMU | unreviewed | Angiotensin-converting enzyme (EC 3.4.-.)                                               | ACE                 | Macaca mulatta (Rhesus macaque) | 1307   |
| F1P21     | F1P21_MACMU     | unreviewed | Uncharacterized protein                                                                 | GSN                 | Macaca mulatta (Rhesus macaque) | 784    |
| O1092     | CYTC_MACMU      | reviewed   | Cytosin C (Cytosin-3)                                                                   | CST3                | Macaca mulatta (Rhesus macaque) | 146    |
| F6ZL5     | F6ZL5_MACMU     | unreviewed | Uncharacterized protein                                                                 | HRG                 | Macaca mulatta (Rhesus macaque) | 525    |
| F0W79     | F0W79_MACMU     | unreviewed | Uncharacterized protein                                                                 | C3                  | Macaca mulatta (Rhesus macaque) | 1663   |
| F1B88     | F1B88_MACMU     | unreviewed | Transferrin                                                                             | TF                  | Macaca mulatta (Rhesus macaque) | 698    |
| F0LZ0     | F0LZ0_MACMU     | unreviewed | Fibrinogen alpha chain                                                                  | FGA                 | Macaca mulatta (Rhesus macaque) | 876    |
| F1D33     | F1D33_MACMU     | unreviewed | SERPIN domain-containing protein                                                        | SERPINF2            | Macaca mulatta (Rhesus macaque) | 555    |
| F1E45     | F1E45_MACMU     | unreviewed | Profilin                                                                                | PFN1                | Macaca mulatta (Rhesus macaque) | 140    |
| F0PL7     | F0PL7_MACMU     | unreviewed | Fibulin-1                                                                               | FBLN1               | Macaca mulatta (Rhesus macaque) | 661    |
| F1D07     | F1D07_MACMU     | unreviewed | Uncharacterized protein                                                                 | CDH5                | Macaca mulatta (Rhesus macaque) | 785    |
| F0Y64     | F0Y64_MACMU     | unreviewed | Hemopexin                                                                               | HPS                 | Macaca mulatta (Rhesus macaque) | 462    |
| AA1D18Q25 | AA1D18Q25_MACMU | unreviewed | Uncharacterized protein                                                                 | CDH1                | Macaca mulatta (Rhesus macaque) | 882    |
| F1HQ1     | F1HQ1_MACMU     | unreviewed | Pemisin (Pyransin)                                                                      | CRF_EGK_01483       | Macaca mulatta (Rhesus macaque) | 224    |
| F1R05     | F1R05_MACMU     | unreviewed | Zn_2pep_PPC domain-containing protein                                                   | GFLD1               | Macaca mulatta (Rhesus macaque) | 858    |
| A0N064    | A0N064_MACMU    | unreviewed | Prothrombin (EC 3.4.21.5) (Coagulation factor II)                                       | F2                  | Macaca mulatta (Rhesus macaque) | 627    |
| F1P72     | F1P72_MACMU     | unreviewed | Uncharacterized protein                                                                 | F12                 | Macaca mulatta (Rhesus macaque) | 615    |
| F1H19     | F1H19_MACMU     | unreviewed | Pomocin (Pomocin)                                                                       | APCS                | Macaca mulatta (Rhesus macaque) | 223    |
| F1H16     | F1H16_MACMU     | unreviewed | Uncharacterized protein                                                                 | VCL                 | Macaca mulatta (Rhesus macaque) | 1134   |
| F0L309    | F0L309_MACMU    | unreviewed | Uncharacterized protein                                                                 | APBH                | Macaca mulatta (Rhesus macaque) | 336    |
| H9YLD6    | H9YLD6_MACMU    | unreviewed | L-selectin                                                                              | SELL                | Macaca mulatta (Rhesus macaque) | 385    |
| F0W5G1    | F0W5G1_MACMU    | unreviewed | Uncharacterized protein                                                                 | CETP                | Macaca mulatta (Rhesus macaque) | 519    |
| F1R09     | F1R09_MACMU     | unreviewed | Superoxide dismutase [Cu-Zn] (EC 1.15.1.1)                                              | SOD3                | Macaca mulatta (Rhesus macaque) | 240    |
| F0S09     | F0S09_MACMU     | unreviewed | MACEP domain-containing protein                                                         | CSA                 | Macaca mulatta (Rhesus macaque) | 584    |
| AA1D18Q70 | AA1D18Q70_MACMU | unreviewed | Uncharacterized protein                                                                 | ITIH4               | Macaca mulatta (Rhesus macaque) | 936    |
| F1R12     | F1R12_MACMU     | unreviewed | MACEP domain-containing protein                                                         | C9                  | Macaca mulatta (Rhesus macaque) | 561    |
| AA1D18Q77 | AA1D18Q77_MACMU | unreviewed | Uncharacterized protein                                                                 | KLKB1               | Macaca mulatta (Rhesus macaque) | 635    |
| F1R09     | F1R09_MACMU     | unreviewed | SERPIN domain-containing protein                                                        | SERPINA6            | Macaca mulatta (Rhesus macaque) | 404    |
| F0L26     | F0L26_MACMU     | unreviewed | Uncharacterized protein                                                                 | RGRP9               | Macaca mulatta (Rhesus macaque) | 297    |
| AA1D18Q86 | AA1D18Q86_MACMU | unreviewed | Lipocalin cytosolic, FA_101_dom domain-containing protein                               | CSG                 | Macaca mulatta (Rhesus macaque) | 202    |
| H9FXZ3    | H9FXZ3_MACMU    | unreviewed | Carboxylester hydrolase (EC 3.1.1.-)                                                    | BCHIE               | Macaca mulatta (Rhesus macaque) | 602    |
| H9R44     | H9R44_MACMU     | unreviewed | Uncharacterized protein                                                                 | GC_EGK_13808        | Macaca mulatta (Rhesus macaque) | 490    |
| F0S32     | F0S32_MACMU     | unreviewed | SERPIN domain-containing protein                                                        | SERPINA3_EGK_18506  | Macaca mulatta (Rhesus macaque) | 448    |
| F1R08     | F1R08_MACMU     | unreviewed | Protein S100 (S100 calcium-binding protein)                                             | S100A9_EGK_01322    | Macaca mulatta (Rhesus macaque) | 114    |
| F1R76     | F1R76_MACMU     | unreviewed | Cyokeratin-1                                                                            | KRT1_EGK_05885      | Macaca mulatta (Rhesus macaque) | 636    |
| F1E44     | F1E44_MACMU     | unreviewed | Chitinase-3 like protein 1                                                              | CHL1                | Macaca mulatta (Rhesus macaque) | 383    |
| F1A81     | F1A81_MACMU     | unreviewed | Globin A1 (Hemoglobin beta chain) (Hemoglobin subunit beta)                             | HBB_GLNA1_EGK_06585 | Macaca mulatta (Rhesus macaque) | 147    |
| F0AC5     | F0AC5_MACMU     | unreviewed | Uncharacterized protein                                                                 | CFHR5               | Macaca mulatta (Rhesus macaque) | 577    |
| F1P09     | F1P09_MACMU     | unreviewed | Lipocalin cytosolic, FA_101_dom domain-containing protein                               | OKMI                | Macaca mulatta (Rhesus macaque) | 214    |
| F0X48     | F0X48_MACMU     | unreviewed | Uncharacterized protein                                                                 | ATRN                | Macaca mulatta (Rhesus macaque) | 1383   |
| F1YX9     | F1YX9_MACMU     | unreviewed | M21_dimer domain-containing protein                                                     | CNP1P               | Macaca mulatta (Rhesus macaque) | 586    |
| AA1D18Q14 | AA1D18Q14_MACMU | unreviewed | Uncharacterized protein                                                                 | IS                  | Macaca mulatta (Rhesus macaque) | 218    |
| F0W3M2    | F0W3M2_MACMU    | unreviewed | Immunoglobulin heavy constant mu                                                        | IGHM                | Macaca mulatta (Rhesus macaque) | 510    |
| F0R84     | F0R84_MACMU     | unreviewed | Tranglin                                                                                | TAGLN2              | Macaca mulatta (Rhesus macaque) | 226    |
| F1D84     | F1D84_MACMU     | unreviewed | Uncharacterized protein                                                                 | C1R                 | Macaca mulatta (Rhesus macaque) | 719    |
| G7N144    | G7N144_MACMU    | unreviewed | Flavin reductase (Flavin reductase (NADPH))                                             | BLVRB_EGK_10628     | Macaca mulatta (Rhesus macaque) | 206    |
| F0ZP7     | F0ZP7_MACMU     | unreviewed | LAM, CL_DOMAIN domain-containing protein                                                | SHBG                | Macaca mulatta (Rhesus macaque) | 449    |
| H9YEV9    | H9YEV9_MACMU    | unreviewed | Uncharacterized protein                                                                 | SHBG                | Macaca mulatta (Rhesus macaque) | 402    |
| AA1D18Q86 | AA1D18Q86_MACMU | unreviewed | Vitamin K-dependent protein C                                                           | PROC                | Macaca mulatta (Rhesus macaque) | 483    |
| F1K86     | F1K86_MACMU     | unreviewed | SRCR domain-containing protein                                                          | LGALS5BP            | Macaca mulatta (Rhesus macaque) | 653    |
| F1E12     | F1E12_MACMU     | unreviewed | Uncharacterized protein                                                                 | TLN1                | Macaca mulatta (Rhesus macaque) | 253    |
| F0SCP6    | F0SCP6_MACMU    | unreviewed | C-X-C motif chemokine                                                                   | PPPB_EGK_15792      | Macaca mulatta (Rhesus macaque) | 128    |
| F1FHW4    | F1FHW4_MACMU    | unreviewed | Uncharacterized protein                                                                 | FN1                 | Macaca mulatta (Rhesus macaque) | 2265   |
| F1F51     | F1F51_MACMU     | unreviewed | Uncharacterized protein                                                                 | NAGLU               | Macaca mulatta (Rhesus macaque) | 615    |
| AA1D18Q88 | AA1D18Q88_MACMU | unreviewed | Uncharacterized protein                                                                 | LOC721200           | Macaca mulatta (Rhesus macaque) | 1734   |
| F1RFD0    | F1RFD0_MACMU    | unreviewed | Fibrinogen C-terminal domain-containing protein                                         | FCN2                | Macaca mulatta (Rhesus macaque) | 288    |
| F0X05     | F0X05_MACMU     | unreviewed | Heparan sulfate 2                                                                       | SERPIND1_EGK_02823  | Macaca mulatta (Rhesus macaque) | 499    |
| AA1D18Q82 | AA1D18Q82_MACMU | unreviewed | C-X-C motif chemokine                                                                   | PF3                 | Macaca mulatta (Rhesus macaque) | 101    |
| F0R05     | F0R05_MACMU     | unreviewed | Uncharacterized protein                                                                 | HP                  | Macaca mulatta (Rhesus macaque) | 361    |
| F1R09     | F1R09_MACMU     | unreviewed | Liposone-associated membrane glycoprotein 2 isoform B                                   | LAMP2               | Macaca mulatta (Rhesus macaque) | 418    |
| F0VKN1    | F0VKN1_MACMU    | unreviewed | Antipeptidase (EC 3.4.11.-)                                                             | ANPEP               | Macaca mulatta (Rhesus macaque) | 968    |
| F1H12     | F1H12_MACMU     | unreviewed | IF-rod domain-containing protein                                                        | KRT14               | Macaca mulatta (Rhesus macaque) | 475    |
| AA1D18R12 | AA1D18R12_MACMU | unreviewed | C-type lectin domain-containing protein                                                 | MIL2                | Macaca mulatta (Rhesus macaque) | 215    |
| AA1D18R15 | AA1D18R15_MACMU | unreviewed | Uncharacterized protein                                                                 | VWF                 | Macaca mulatta (Rhesus macaque) | 2824   |
| F1R82     | F1R82_MACMU     | unreviewed | Serum albumin                                                                           | ALB                 | Macaca mulatta (Rhesus macaque) | 588    |
| F0W01     | F0W01_MACMU     | unreviewed | Vitamin K-dependent protein S                                                           | PROS1               | Macaca mulatta (Rhesus macaque) | 676    |
| AA1D18Q00 | AA1D18Q00_MACMU | unreviewed | Uncharacterized protein                                                                 | LOC714514           | Macaca mulatta (Rhesus macaque) | 1658   |
| F0S22     | F0S22_MACMU     | unreviewed | Uncharacterized protein                                                                 | CAIIPA              | Macaca mulatta (Rhesus macaque) | 598    |
| AA1D18Q71 | AA1D18Q71_MACMU | unreviewed | Uncharacterized protein                                                                 | FETUB               | Macaca mulatta (Rhesus macaque) | 382    |
| F1AL6     | F1AL6_MACMU     | unreviewed | Uncharacterized protein                                                                 | C7                  | Macaca mulatta (Rhesus macaque) | 843    |
| F1E47     | F1E47_MACMU     | unreviewed | Uncharacterized protein                                                                 | C1S                 | Macaca mulatta (Rhesus macaque) | 679    |
| F1E23     | F1E23_MACMU     | unreviewed | C-type lectin domain-containing protein                                                 | MBP-A               | Macaca mulatta (Rhesus macaque) | 249    |
| F1TK4     | F1TK4_MACMU     | unreviewed | Uncharacterized protein                                                                 | ACTB                | Macaca mulatta (Rhesus macaque) | 375    |
| F0YB6     | F0YB6_MACMU     | unreviewed | SERPIN domain-containing protein                                                        | SERPINA5            | Macaca mulatta (Rhesus macaque) | 172    |
| F1R16     | F1R16_MACMU     | unreviewed | Uncharacterized protein                                                                 | CPS2                | Macaca mulatta (Rhesus macaque) | 545    |
| G7MVP0    | G7MVP0_MACMU    | unreviewed | SPARC                                                                                   | SPARC_EGK_17045     | Macaca mulatta (Rhesus macaque) | 303    |
| F0D08     | F0D08_MACMU     | unreviewed | Insulin-like growth factor 1 isoform 4 preproprotein                                    | IGF1                | Macaca mulatta (Rhesus macaque) | 153    |
| F1D08     | F1D08_MACMU     | unreviewed | Uncharacterized protein                                                                 | TLH2                | Macaca mulatta (Rhesus macaque) | 946    |
| B3Y88     | B3Y88_MACMU     | unreviewed | Monocyte differentiation antigen CD14 (Myeloid cell-specific leucine-rich glycoprotein) | CD14                | Macaca mulatta (Rhesus macaque) | 375    |
| F1R05     | F1R05_MACMU     | unreviewed | Tetranectin                                                                             | CLC3B               | Macaca mulatta (Rhesus macaque) | 202    |
| F1R19     | F1R19_MACMU     | unreviewed | Uncharacterized protein                                                                 | HGFAC               | Macaca mulatta (Rhesus macaque) | 626    |
| AA1D18QX6 | AA1D18QX6_MACMU | unreviewed | Protein S100 (S100 calcium-binding protein)                                             | S100A8_EGK_21438    | Macaca mulatta (Rhesus macaque) | 93     |
| F0R10     | F0R10_MACMU     | unreviewed | Viologin domain-containing protein                                                      | APB9                | Macaca mulatta (Rhesus macaque) | 4555   |
| F1GHV1    | F1GHV1_MACMU    | unreviewed | IF-rod domain-containing protein                                                        | KRT9                | Macaca mulatta (Rhesus macaque) | 621    |
| F1FQ0     | F1FQ0_MACMU     | unreviewed | Ig-like domain-containing protein                                                       | AIHG                | Macaca mulatta (Rhesus macaque) | 1676   |
| F1P16     | F1P16_MACMU     | unreviewed | MACEP domain-containing protein                                                         | C8S                 | Macaca mulatta (Rhesus macaque) | 413    |
| G7NQC3    | G7NQC3_MACMU    | unreviewed | Hemoglobin alpha chain (Hemoglobin subunit alpha)                                       | HBA2_HBA_EGK_12276  | Macaca mulatta (Rhesus macaque) | 142    |
| F1RQ3     | F1RQ3_MACMU     | unreviewed | Peptidase, M14 domain-containing protein                                                | CPB2                | Macaca mulatta (Rhesus macaque) | 386    |
| F0X04     | F0X04_MACMU     | unreviewed | Uncharacterized protein                                                                 | ANBP                | Macaca mulatta (Rhesus macaque) | 352    |
| F0S85     | F0S85_MACMU     | unreviewed | Clusterin                                                                               | CLU                 | Macaca mulatta (Rhesus macaque) | 446    |
| F1RQ1     | F1RQ1_MACMU     | unreviewed | Fibrinogen C-terminal domain-containing protein                                         | LOC100427524        | Macaca mulatta (Rhesus macaque) | 312    |
| F1E12     | F1E12_MACMU     | unreviewed | Uncharacterized protein                                                                 | IL1E2               | Macaca mulatta (Rhesus macaque) | 395    |
| F0YK5     | F0YK5_MACMU     | unreviewed | Uncharacterized protein                                                                 | C2_EGK_14737        | Macaca mulatta (Rhesus macaque) | 752    |
| F1R84     | F1R84_MACMU     | unreviewed | Uncharacterized protein                                                                 | I9                  | Macaca mulatta (Rhesus macaque) | 461    |
| F1R09     | F1R09_MACMU     | unreviewed | SERPIN domain-containing protein                                                        | SERPINA7            | Macaca mulatta (Rhesus macaque) | 415    |
| F1GAT4    | F1GAT4_MACMU    | unreviewed | Uncharacterized protein                                                                 | ITHB3               | Macaca mulatta (Rhesus macaque) | 891    |
| F1R09     | F1R09_MACMU     | unreviewed | Keratan sulfate proteoglycan hemican (Lumican)                                          | LUM_EGK_04848       | Macaca mulatta (Rhesus macaque) | 338    |
| F1E10     | F1E10_MACMU     | unreviewed | Complement C1q subcomponent subunit C                                                   | C1QC_EGK_00353      | Macaca mulatta (Rhesus macaque) | 245    |
| F1F46     | F1F46_MACMU     | unreviewed | SERPIN domain-containing protein                                                        | SERPING1            | Macaca mulatta (Rhesus macaque) | 500    |
| F0YWC2    | F0YWC2_MACMU    | unreviewed | Uncharacterized protein                                                                 | C2                  | Macaca mulatta (Rhesus macaque) | 1286   |
| F0L81     | F0L81_MACMU     | unreviewed | SERPIN domain-containing protein                                                        | AGT                 | Macaca mulatta (Rhesus macaque) | 485    |
| F1DL8     | F1DL8_MACMU     | unreviewed | Uncharacterized protein                                                                 | POSTN               | Macaca mulatta (Rhesus macaque) | 772    |
| F1E32     | F1E32_MACMU     | unreviewed | Uncharacterized protein                                                                 | FCM1_EGK_01229      | Macaca mulatta (Rhesus macaque) | 567    |
| F1R04     | F1R04_MACMU     | unreviewed | Uncharacterized protein                                                                 | LBP                 | Macaca mulatta (Rhesus macaque) | 481    |
| F1TN9     | F1TN9_MACMU     | unreviewed | Uncharacterized protein                                                                 | A2M                 | Macaca mulatta (Rhesus macaque) | 1474   |
| AA1D18Q81 | AA1D18Q81_MACMU | unreviewed | Uncharacterized protein                                                                 | ITIH1               | Macaca mulatta (Rhesus macaque) | 911    |
| H9F76     | H9F76_MACMU     | unreviewed | Uncharacterized protein                                                                 | CFH                 | Macaca mulatta (Rhesus macaque) | 987    |
| F0Y74     | F0Y74_MACMU     | unreviewed | Uncharacterized protein                                                                 | GFALS               | Macaca mulatta (Rhesus macaque) | 652    |
| F0F01     | F0F01_MACMU     | unreviewed | Uncharacterized protein                                                                 | FH1                 | Macaca mulatta (Rhesus macaque) | 625    |
| F1R03     | F1R03_MACMU     | unreviewed | C1q domain-containing protein                                                           | ADPPOQ              | Macaca mulatta (Rhesus macaque) | 249    |
| F0YK7     | F0YK7_MACMU     | unreviewed | Uncharacterized protein                                                                 | PGLYRP2             | Macaca mulatta (Rhesus macaque) | 624    |
| AA1D18Q16 | AA1D18Q16_MACMU | unreviewed | Uncharacterized protein                                                                 | OPR3                | Macaca mulatta (Rhesus macaque) | 216    |
| F1R09     | F1R09_MACMU     | unreviewed | Uncharacterized protein                                                                 | C1RL                | Macaca mulatta (Rhesus macaque) | 485    |
| F1E55     | F1E55_MACMU     | unreviewed | SH2T domain-containing protein                                                          | CRISP3              | Macaca mulatta (Rhesus macaque) | 275    |
| AA1D18Q20 | AA1D18Q20_MACMU | unreviewed | Transferrin                                                                             | TFR_EGK_09613       | Macaca mulatta (Rhesus macaque) | 147    |
| F0S26     | F0S26_MACMU     | unreviewed | Alpha 1-macroglobin                                                                     | SERPINA1_EGK_18500  | Macaca mulatta (Rhesus macaque) | 418    |
| F1R02     | F1R02_MACMU     | unreviewed | Uncharacterized protein                                                                 | C9                  | Macaca mulatta (Rhesus macaque) | 934    |
| F1A47     | F1A47_MACMU     | unreviewed | Uncharacterized protein                                                                 | AFM                 | Macaca mulatta (Rhesus macaque) | 599    |
| H9Y19     | H9Y19_MACMU     | unreviewed | Retroviral-binding protein                                                              | RBP4                | Macaca mulatta (Rhesus macaque) | 201    |
| F1A89     | F1A89_MACMU     | unreviewed | Cyokeratin 2e                                                                           | KRT2_EGK_03684      | Macaca mulatta (Rhesus macaque) | 641    |
| F0W75     | F0W75_MACMU     | unreviewed | Mannan binding lectin serine peptidase 2                                                | MASP2               | Macaca mulatta (Rhesus macaque) | 686    |
| F1R41     | F1R41_MACMU     | unreviewed | Uncharacterized protein                                                                 | MASP1               | Macaca mulatta (Rhesus macaque) | 723    |
| F0Z17     | F0Z17_MACMU     | unreviewed | Uncharacterized protein                                                                 | AHS0                | Macaca mulatta (Rhesus macaque) | 367    |
| F0S43     | F0S43_MACMU     | unreviewed | Uncharacterized protein                                                                 | KNIG1_EGK_12191     | Macaca mulatta (Rhesus macaque) | 644    |
| F0S17     | F0S17_MACMU     | unreviewed | Uncharacterized protein                                                                 | PROZ                | Macaca mulatta (Rhesus macaque) | 422    |
| F1H21     | F1H21_MACMU     | unreviewed | Coagulation factor X, preproprotein                                                     | F10                 | Macaca mulatta (Rhesus macaque) | 488    |
| F1R10     | F1R10_MACMU     | unreviewed | SERPIN domain-containing protein                                                        | SERPINA10           | Macaca mulatta (Rhesus macaque) | 471    |
| F1R09     | F1R09_MACMU     | unreviewed | Uncharacterized protein                                                                 | APCS2               | Macaca mulatta (Rhesus macaque) | 117    |
| F0Z15     | F0Z15_MACMU     | unreviewed | Peptidase S1 domain-containing protein                                                  | LOC709274           | Macaca mulatta (Rhesus macaque) | 340    |
| F0YW9     | F0YW9_MACMU     | unreviewed | Ig-like domain-containing protein                                                       | AZPPI               | Macaca mulatta (Rhesus macaque) | 298    |
| F1R16     | F1R16_MACMU     | unreviewed | Uncharacterized protein                                                                 | CF                  | Macaca mulatta (Rhesus macaque) | 1090   |
| AA1D18Q18 | AA1D18Q18_MACMU | unreviewed | Uncharacterized protein                                                                 | CFI                 | Macaca mulatta (Rhesus macaque) | 590    |
| F1R16     | F1R16_MACMU     | unreviewed | LRRCT domain-containing protein                                                         | LRC1                | Macaca mulatta (Rhesus macaque) | 383    |
| AA1D18Q27 | AA1D18Q27_MACMU | unreviewed | Uncharacterized protein                                                                 | LOC10696991         | Macaca mulatta (Rhesus macaque) | 222    |
| F1C91     | F1C91_MACMU     | unreviewed | Plasminogen (EC 3.4.21.7)                                                               | PLG                 | Macaca mulatta (Rhesus macaque) | 810    |
| AA1D18Q10 | AA1D18Q10_MACMU | unreviewed | Amino oxidase (EC 1.4.3.-)                                                              | LOC708853           | Macaca mulatta (Rhesus macaque) | 752    |
| F0R02     | F0R02_MACMU     | unreviewed | SERPIN domain-containing protein                                                        | SERPINF1            | Macaca mulatta (Rhesus macaque) | 418    |
| F0Y09     | F0Y09_MACMU     | unreviewed | Uncharacterized protein                                                                 | SERPINC1            | Macaca mulatta (Rhesus macaque) | 464    |
| F0S80     | F0S80_MACMU     | unreviewed | Fructose-bisphosphate aldolase (EC 4.1.2.13)                                            | ALDOA               | Macaca mulatta (Rhesus macaque) | 355    |
| F0Z09     | F0Z09_MACMU     | unreviewed | Uncharacterized protein                                                                 | MYH1                | Macaca mulatta (Rhesus macaque) | 1919   |
| F1P18     | F1P18_MACMU     | unreviewed | Apolipoprotein(a)                                                                       | LPA                 | Macaca mulatta (Rhesus macaque) | 1636   |
| AA1D18Q45 | AA1D18Q45_MACMU | unreviewed | Uncharacterized protein                                                                 | P2P                 | Macaca mulatta (Rhesus macaque) | 1483   |
| F1R07     | F1R07_MACMU     | unreviewed | IF-rod domain-containing protein                                                        | KRT10               | Macaca mulatta (Rhesus macaque) | 566    |
| F0S89     | F0S89_MACMU     | unreviewed | Uncharacterized protein                                                                 | VTN                 | Macaca mulatta (Rhesus macaque) | 448    |
| F1R84     | F1R84_MACMU     | unreviewed | Uncharacterized protein                                                                 | CHL1                | Macaca mulatta (Rhesus macaque) | 1169   |
| F1D45     | F1D45_MACMU     | unreviewed | Uncharacterized protein                                                                 | HABP2               | Macaca mulatta (Rhesus macaque) | 560    |
| F1D10     | F1D10_MACMU     | unreviewed | Tubulin alpha chain                                                                     | TUBA1B              | Macaca mulatta (Rhesus macaque) | 386    |
| F1R06     | F1R06_MACMU     | unreviewed | Apolipoprotein A4                                                                       | AP0A4               | Macaca mulatta (Rhesus macaque) | 411    |







Supplementary Table 5.

| Uniprot Symbol | 0.25 h/Pre |      | 0.5 h/Pre |          | 1 h/Pre  |          | 2 h/Pre  |          | 4 h/Pre  |          | 8 h/Pre  |          | 16 h/Pre |          | 1 d/Pre  |          | 2 d/Pre  |          | 3 d/Pre  |          | 7 d/Pre  |          | 14 d/Pre |          | 21 d/Pre |          |          |          |          |          |          |      |
|----------------|------------|------|-----------|----------|----------|----------|----------|----------|----------|----------|----------|----------|----------|----------|----------|----------|----------|----------|----------|----------|----------|----------|----------|----------|----------|----------|----------|----------|----------|----------|----------|------|
|                | p-value    | FDR  | log2(FC)  | p-value  | FDR      | log2(FC) | p-value  | FDR      | log2(FC) | p-value  | FDR      | log2(FC) | p-value  | FDR      | log2(FC) | p-value  | FDR      | log2(FC) | p-value  | FDR      | log2(FC) | p-value  | FDR      | log2(FC) | p-value  | FDR      |          |          |          |          |          |      |
| B4BP1          | 1.69E-02   | 0.26 | 1.10E-02  | 2.79     | 4.31E-02 | 2.79     | 4.31E-02 | 1.61     | 6.92E-02 | 2.33     | 1.23E-02 | 1.37     | 5.44E-02 | 1.37     | 1.47E-01 | 0.82     | 1.70E-01 | 0.43     | 9.47E-01 | 0.53     | 9.94E-01 | 0.53     | 9.94E-01 | 0.16     | 6.98E-01 | 0.16     | 6.98E-01 | 0.00     |          |          |          |      |
| MGHP6          | 1.57E-01   | 0.29 | 2.90      | 2.60E-03 | 3.22     | 2.16E-03 | 3.21     | 2.14E-01 | 1.88     | 7.27E-03 | 1.88     | 7.27E-03 | 1.72     | 7.29E-01 | 0.41     | 4.42E-01 | 0.20     | 7.69E-02 | 0.93     | 8.42E-01 | 0.17     | 2.98E-01 | 1.28     | 8.35E-02 | 0.91     | 4.31E-01 | 0.77     |          |          |          |          |      |
| TLJ35          | 7.27E-02   | 0.28 | 1.20      | 4.00E-01 | 1.10     | 9.37E-01 | 1.10     | 9.37E-01 | 2.51     | 5.77E-02 | 2.51     | 5.77E-02 | 1.11     | 6.32E-01 | 0.19     | 3.18E-01 | 0.19     | 3.18E-01 | 0.20     | 5.12E-02 | 0.20     | 5.12E-02 | 0.52     | 7.65E-02 | 0.52     | 7.65E-02 | 0.22     |          |          |          |          |      |
| D0NN1          | 7.37E-01   | 0.52 | 2.56E-02  | 2.12     | 4.96E-02 | 0.70     | 5.62E-01 | 0.97     | 9.38E-01 | 0.30     | 2.01E-01 | 0.63     | 3.40E-02 | 0.45     | 3.40E-02 | 1.22     | 2.56E-01 | 0.69     | 1.08E-01 | 0.48     | 1.76E-01 | 0.48     | 1.76E-01 | 0.48     | 5.95E-01 | 0.48     | 5.95E-01 | 0.01     |          |          |          |      |
| Q53G6          | 1.28E-02   | 0.25 | 2.73      | 7.94E-02 | 2.23     | 2.20E-02 | 2.23     | 2.20E-02 | 2.58     | 3.32E-02 | 2.10     | 4.37E-02 | 1.24     | 6.66E-03 | 1.96     | 5.13E-01 | 0.33     | 4.62E-02 | 0.96     | 5.06E-01 | 0.17     | 1.73E-01 | 0.58     | 7.33E-02 | 0.66     | 5.15E-01 | 0.66     | 5.15E-01 | 0.46     |          |          |      |
| F2M35          | 9.70E-02   | 0.26 | 0.56      | 3.94E-01 | 0.26     | 1.37E-01 | 0.26     | 1.37E-01 | 0.45     | 2.81E-01 | 0.45     | 2.81E-01 | 0.27     | 9.79E-01 | 0.11     | 6.59E-01 | 0.11     | 6.59E-01 | 0.26     | 1.72E-01 | 0.26     | 1.72E-01 | 0.79     | 4.29E-02 | 0.44     | 6.29E-02 | 0.44     | 6.29E-02 | 0.27     |          |          |      |
| B4BRV0         | 9.23E-02   | 0.28 | 0.57      | 5.75E-02 | 4.64     | 1.33E-01 | 4.64     | 1.33E-01 | 1.18     | 1.58E-01 | 1.18     | 1.58E-01 | 0.76     | 7.43E-03 | 1.36     | 3.65E-02 | 0.57     | 3.59E-02 | 0.67     | 5.54E-01 | 0.67     | 5.54E-01 | 0.58     | 8.84E-02 | 0.58     | 8.84E-02 | 0.21     |          |          |          |          |      |
| Q52H26         | 5.73E-02   | 0.25 | 1.84      | 2.49E-01 | 0.55     | 2.33E-01 | 0.55     | 2.33E-01 | 0.63     | 0.77E-01 | 0.63     | 0.77E-01 | 0.47     | 3.47E-01 | 0.54     | 3.27E-01 | 0.29     | 3.06E-01 | 0.42     | 1.76E-01 | 0.42     | 1.76E-01 | 0.88     | 9.68E-01 | 0.88     | 9.68E-01 | 0.33     | 4.17E-01 | 0.43     |          |          |      |
| RT-Cal protein | 4.90E-01   | 0.07 | 4.19E-01  | 0.08     | 5.39E-01 | 0.07     | 6.17E-01 | 0.06     | 7.99E-01 | 0.07     | 9.01E-01 | 0.06     | 7.99E-01 | 0.06     | 7.99E-01 | 0.06     | 7.99E-01 | 0.06     | 7.99E-01 | 0.06     | 7.99E-01 | 0.06     | 7.99E-01 | 0.06     | 7.99E-01 | 0.06     | 7.99E-01 | 0.06     | 7.99E-01 | 0.06     |          |      |
| ADA052Z3D5     | 9.76E-02   | 0.25 | 0.73      | 3.17E-01 | 0.25     | 3.17E-01 | 0.25     | 3.17E-01 | 0.15     | 4.03E-02 | 0.15     | 4.03E-02 | 0.15     | 4.03E-02 | 0.15     | 4.03E-02 | 0.15     | 4.03E-02 | 0.15     | 4.03E-02 | 0.15     | 4.03E-02 | 0.15     | 4.03E-02 | 0.15     | 4.03E-02 | 0.15     | 4.03E-02 | 0.15     | 4.03E-02 | 0.15     |      |
| ADA024R4G6     | 4.53E-01   | 0.42 | 3.38E-01  | 0.21     | 6.44E-01 | 0.20     | 4.16E-01 | 0.20     | 4.16E-01 | 0.20     | 4.16E-01 | 0.20     | 4.16E-01 | 0.20     | 4.16E-01 | 0.20     | 4.16E-01 | 0.20     | 4.16E-01 | 0.20     | 4.16E-01 | 0.20     | 4.16E-01 | 0.20     | 4.16E-01 | 0.20     | 4.16E-01 | 0.20     | 4.16E-01 | 0.20     |          |      |
| ADA037WV43     | 1.88E-02   | 0.32 | 5.64E-01  | 0.08     | 3.19E-02 | 0.43     | 6.09E-02 | 0.42     | 6.57E-01 | 0.22     | 3.13E-02 | 0.22     | 3.13E-02 | 0.22     | 3.13E-02 | 0.22     | 3.13E-02 | 0.22     | 3.13E-02 | 0.22     | 3.13E-02 | 0.22     | 3.13E-02 | 0.22     | 3.13E-02 | 0.22     | 3.13E-02 | 0.22     | 3.13E-02 | 0.22     |          |      |
| B1AP5          | 1.57E-01   | 0.52 | 9.19E-01  | 0.04     | 1.25E-01 | 0.43     | 9.51E-02 | 0.73     | 7.39E-01 | 0.17     | 1.04E-01 | 0.82     | 7.41E-01 | 0.23     | 2.51E-01 | 0.74     | 1.41E-01 | 0.52     | 3.98E-01 | 0.52     | 3.13E-02 | 0.52     | 3.13E-02 | 0.60     | 6.85E-01 | 0.60     | 6.85E-01 | 0.35     | 5.31E-01 | 0.38     |          |      |
| B2BR88         | 8.70E-01   | 0.07 | 7.05E-01  | 0.06     | 1.49E-01 | 0.03     | 9.52E-02 | 0.45     | 1.32E-01 | 0.32     | 3.81E-02 | 0.75     | 6.13E-01 | 0.22     | 1.71E-03 | 0.68     | 1.88E-02 | 0.65     | 3.84E-02 | 0.62     | 1.50E-01 | 0.62     | 1.50E-01 | 0.42     | 1.09E-01 | 0.42     | 1.09E-01 | 0.26     | 2.43E-01 | 0.26     |          |      |
| ADA024R62      | 7.43E-01   | 0.27 | 7.78E-01  | 0.01     | 1.50E-01 | 0.06     | 1.73E-01 | 0.06     | 1.73E-01 | 0.06     | 1.73E-01 | 0.06     | 1.73E-01 | 0.06     | 1.73E-01 | 0.06     | 1.73E-01 | 0.06     | 1.73E-01 | 0.06     | 1.73E-01 | 0.06     | 1.73E-01 | 0.06     | 1.73E-01 | 0.06     | 1.73E-01 | 0.06     | 1.73E-01 | 0.06     |          |      |
| D95GG2         | 2.93E-01   | 0.19 | 4.70E-01  | 0.12     | 5.83E-02 | 0.36     | 2.75E-01 | 0.19     | 3.44E-01 | 0.20     | 8.87E-02 | 0.35     | 8.34E-01 | 0.20     | 2.55E-02 | 0.45     | 6.04E-02 | 0.35     | 1.40E-01 | 0.35     | 1.40E-01 | 0.35     | 1.40E-01 | 0.35     | 1.40E-01 | 0.35     | 1.40E-01 | 0.35     | 1.40E-01 | 0.35     |          |      |
| B7549          | 2.08E-01   | 0.34 | 5.55E-01  | 0.10     | 9.85E-02 | 0.56     | 2.61E-01 | 0.54     | 4.76E-01 | 0.14     | 3.63E-01 | 0.46     | 9.39E-01 | 0.03     | 8.71E-01 | 0.11     | 6.54E-01 | 0.33     | 1.08E-01 | 0.66     | 3.56E-02 | 0.66     | 3.56E-02 | 0.57     | 4.95E-01 | 0.57     | 4.95E-01 | 0.49     | 5.91E-01 | 0.49     |          |      |
| ADA024R4A7     | 8.68E-01   | 0.03 | 5.23E-01  | 0.16     | 9.72E-01 | 0.06     | 9.44E-01 | 0.03     | 5.50E-01 | 0.12     | 9.58E-01 | 0.08     | 4.45E-01 | 0.20     | 6.01E-01 | 0.39     | 9.06E-01 | 0.07     | 6.82E-01 | 0.09     | 6.61E-01 | 0.09     | 6.61E-01 | 0.12     | 5.74E-01 | 0.12     | 5.74E-01 | 0.13     | 9.97E-01 | 0.13     |          |      |
| D6R934         | 8.37E-01   | 0.10 | 8.15E-02  | 0.51     | 2.28E-01 | 0.58     | 6.37E-01 | 0.14     | 9.10E-01 | 0.08     | 7.40E-01 | 0.15     | 9.20E-01 | 0.20     | 8.08E-01 | 0.26     | 9.21E-01 | 0.03     | 5.68E-01 | 0.18     | 6.99E-01 | 0.18     | 6.99E-01 | 0.11     | 5.44E-01 | 0.11     | 5.44E-01 | 0.15     | 5.44E-01 | 0.15     |          |      |
| Q8VCO          | 3.87E-01   | 0.17 | 1.98E-01  | 0.40     | 1.74E-01 | 0.26     | 5.31E-01 | 0.16     | 9.06E-01 | 0.06     | 6.72E-01 | 0.16     | 9.06E-01 | 0.16     | 9.06E-01 | 0.16     | 9.06E-01 | 0.16     | 9.06E-01 | 0.16     | 9.06E-01 | 0.16     | 9.06E-01 | 0.16     | 9.06E-01 | 0.16     | 9.06E-01 | 0.16     | 9.06E-01 | 0.16     | 9.06E-01 | 0.16 |
| ADA140WV3      | 7.90E-01   | 0.10 | 6.97E-01  | 0.08     | 3.73E-01 | 0.50     | 4.55E-01 | 0.19     | 5.48E-01 | 0.17     | 9.13E-02 | 0.54     | 8.98E-01 | 0.05     | 7.73E-01 | 0.27     | 9.96E-01 | 0.01     | 2.04E-01 | 0.27     | 2.44E-02 | 0.27     | 2.44E-02 | 0.41     | 7.81E-01 | 0.41     | 7.81E-01 | 0.11     | 5.57E-01 | 0.11     |          |      |
| B3KTC6         | 3.72E-02   | 0.28 | 1.96E-02  | 0.45     | 9.45E-02 | 2.91     | 6.52E-02 | 2.34     | 6.29E-01 | 0.63     | 8.90E-01 | 0.44     | 4.46E-01 | 1.74     | 5.78E-01 | 0.28     | 2.54E-01 | 3.11     | 6.69E-01 | 0.54     | 3.18E-01 | 0.54     | 3.18E-01 | 0.24     | 5.05E-01 | 0.24     | 5.05E-01 | 2.53     | 2.24E-01 | 2.53     |          |      |
| E9P13          | 9.15E-01   | 0.07 | 3.26E-01  | 0.41     | 1.16E-01 | 1.50     | 6.66E-01 | 0.36     | 8.41E-01 | 0.43     | 2.44E-01 | 1.09     | 8.65E-01 | 0.17     | 3.14E-01 | 0.71     | 8.50E-01 | 0.13     | 7.43E-01 | 0.34     | 2.95E-01 | 0.34     | 2.95E-01 | 0.96     | 4.86E-01 | 0.96     | 4.86E-01 | 0.37     | 9.00E-01 | 0.37     |          |      |
| WHVW49         | 4.99E-02   | 0.53 | 9.78E-01  | 0.01     | 3.49E-01 | 0.40     | 1.80E-01 | 0.45     | 9.40E-01 | 0.03     | 3.48E-01 | 0.05     | 4.46E-01 | 0.30     | 3.12E-01 | 0.37     | 1.45E-01 | 0.40     | 2.90E-02 | 0.40     | 2.90E-02 | 0.40     | 2.90E-02 | 0.28     | 3.19E-01 | 0.28     | 3.19E-01 | 0.24     | 9.00E-01 | 0.24     |          |      |
| D93PD0         | 8.87E-01   | 0.23 | 7.43E-01  | 0.15     | 3.10E-01 | 0.52     | 5.66E-01 | 0.24     | 6.87E-01 | 0.24     | 6.87E-01 | 0.24     | 6.87E-01 | 0.24     | 6.87E-01 | 0.24     | 6.87E-01 | 0.24     | 6.87E-01 | 0.24     | 6.87E-01 | 0.24     | 6.87E-01 | 0.24     | 6.87E-01 | 0.24     | 6.87E-01 | 0.24     | 6.87E-01 | 0.24     | 6.87E-01 | 0.24 |
| Q91V90         | 9.01E-01   | 0.18 | 9.62E-02  | 0.48     | 2.97E-01 | 0.48     | 2.97E-01 | 0.48     | 2.97E-01 | 0.48     | 2.97E-01 | 0.48     | 2.97E-01 | 0.48     | 2.97E-01 | 0.48     | 2.97E-01 | 0.48     | 2.97E-01 | 0.48     | 2.97E-01 | 0.48     | 2.97E-01 | 0.48     | 2.97E-01 | 0.48     | 2.97E-01 | 0.48     | 2.97E-01 | 0.48     | 2.97E-01 | 0.48 |
| WHVW98         | 4.53E-01   | 0.26 | 2.72E-01  | 0.56     | 8.78E-01 | 0.20     | 9.60E-01 | 0.16     | 6.69E-01 | 0.00     | 2.46E-01 | 0.46     | 3.83E-01 | 0.33     | 9.73E-01 | 0.07     | 4.18E-01 | 0.30     | 8.62E-01 | 0.07     | 3.86E-01 | 0.07     | 3.86E-01 | 0.10     | 7.02E-01 | 0.10     | 7.02E-01 | 0.14     | 9.52E-01 | 0.14     |          |      |
| WHVW99         | 1.02E-01   | 1.00 | 1.18E-01  | 1.05     | 1.65E-01 | 2.73     | 9.05E-01 | 0.10     | 5.44E-02 | 1.39     | 2.02E-01 | 2.22     | 6.71E-01 | 0.13     | 3.29E-02 | 2.04     | 1.69E-01 | 0.97     | 9.85E-01 | 0.40     | 6.79E-01 | 0.40     | 6.79E-01 | 0.18     | 6.33E-01 | 0.18     | 6.33E-01 | 0.32     | 3.78E-02 | 0.32     |          |      |
| ASPL27         | 3.13E-01   | 0.57 | 9.60E-01  | 0.16     | 1.44E-01 | 0.64     | 9.84E-01 | 0.03     | 7.90E-01 | 0.57     | 9.00E-01 | 0.20     | 5.26E-01 | 0.10     | 8.80E-01 | 0.09     | 9.02E-01 | 0.01     | 5.72E-01 | 0.01     | 5.72E-01 | 0.01     | 5.72E-01 | 0.13     | 6.64E-01 | 0.13     | 6.64E-01 | 0.20     | 3.78E-01 | 0.20     |          |      |
| G31ZW1         | 3.91E-01   | 0.24 | 9.23E-01  | 0.01     | 3.37E-01 | 0.49     | 6.37E-01 | 0.01     | 3.37E-01 | 0.49     | 6.37E-01 | 0.01     | 3.37E-01 | 0.49     | 6.37E-01 | 0.01     | 3.37E-01 | 0.49     | 6.37E-01 | 0.01     | 3.37E-01 | 0.49     | 6.37E-01 | 0.01     | 3.37E-01 | 0.49     | 6.37E-01 | 0.01     | 3.37E-01 | 0.49     | 6.37E-01 | 0.01 |
| M2R98          | 5.24E-02   | 0.35 | 8.42E-01  | 0.54     | 9.57E-01 | 0.16     | 4.62E-01 | 0.28     | 7.13E-01 | 0.28     | 7.13E-01 | 0.28     | 7.13E-01 | 0.28     | 7.13E-01 | 0.28     | 7.13E-01 | 0.28     | 7.13E-01 | 0.28     | 7.13E-01 | 0.28     | 7.13E-01 | 0.28     | 7.13E-01 | 0.28     | 7.13E-01 | 0.28     | 7.13E-01 | 0.28     | 7.13E-01 | 0.28 |
| B2R815         | 6.16E-01   | 0.18 | 5.49E-01  | 0.20     | 1.68E-01 | 0.47     | 4.26E-01 | 0.23     | 5.71E-01 | 0.18     | 4.36E-01 | 0.36     | 5.16E-01 | 0.21     | 7.71E-01 | 0.20     | 8.58E-01 | 0.00     | 8.69E-01 | 0.00     |          |          |          |          |          |          |          |          |          |          |          |      |



Supplementary Table 5.

| Uniprot Symbol | 0.25 h/Pre |          | 0.5 h/Pre |          | 1 h/Pre  |          | 2 h/Pre  |          | 4 h/Pre  |          | 8 h/Pre  |          | 16 h/Pre |          | 1 d/Pre  |          | 2 d/Pre  |          | 3 d/Pre  |          | 7 d/Pre  |          | 14 d/Pre |          | 21 d/Pre |          |          |          |          |       |          |    |
|----------------|------------|----------|-----------|----------|----------|----------|----------|----------|----------|----------|----------|----------|----------|----------|----------|----------|----------|----------|----------|----------|----------|----------|----------|----------|----------|----------|----------|----------|----------|-------|----------|----|
|                | p-value    | FDR      | log2(FC)  | p-value  | FDR      | log2(FC) | p-value  | FDR      | log2(FC) | p-value  | FDR      | log2(FC) | p-value  | FDR      | log2(FC) | p-value  | FDR      | log2(FC) | p-value  | FDR      | log2(FC) | p-value  | FDR      | log2(FC) | p-value  | FDR      | log2(FC) |          |          |       |          |    |
| F7H132         | 0.38       | 6.33E-01 | NS        | 0.38     | 6.33E-01 | NS       | 0.38     | 6.33E-01 | NS       | 0.38     | 6.33E-01 | NS       | 0.38     | 6.33E-01 | NS       | 0.38     | 6.33E-01 | NS       | 0.38     | 6.33E-01 | NS       | 0.38     | 6.33E-01 | NS       | 0.38     | 6.33E-01 | NS       | 0.38     | 6.33E-01 | NS    |          |    |
| F65Y4D         | 1.02E-02   | NS       | 1.57      | 2.47E-02 | NS       | 1.29     | 9.35E-02 | NS       | 2.26     | 2.77E-03 | NS       | 1.69     | 6.80E-03 | NS       | 2.15     | 8.26E-03 | NS       | 2.19     | 2.76E-02 | NS       | 1.15     | 1.25E-02 | NS       | 1.55     | 9.88E-02 | NS       | 1.65     | 7.03E-02 | NS       | 1.41  | 3.22E-01 | NS |
| F6H14          | 9.65E-01   | NS       | 0.99      | 9.65E-01 | NS       | 0.99     | 9.65E-01 | NS       | 0.99     | 9.65E-01 | NS       | 0.99     | 9.65E-01 | NS       | 0.99     | 9.65E-01 | NS       | 0.99     | 9.65E-01 | NS       | 0.99     | 9.65E-01 | NS       | 0.99     | 9.65E-01 | NS       | 0.99     | 9.65E-01 | NS       | 0.99  | 9.65E-01 | NS |
| F7H1K4         | 1.30E-02   | NS       | 2.64      | 3.65E-02 | NS       | 2.23     | 1.47E-02 | NS       | 2.35     | 2.86E-02 | NS       | 2.30     | 3.20E-02 | NS       | 1.15     | 2.27E-03 | NS       | 1.81     | 1.72E-01 | NS       | 0.59     | 4.81E-02 | NS       | 1.06     | 5.99E-03 | NS       | 0.74     | 2.17E-01 | NS       | 0.38  | 1.37E-02 | NS |
| F7H147         | 2.95E-03   | NS       | 0.45      | 4.58E-03 | NS       | 0.64     | 6.91E-02 | NS       | 0.33     | 1.17E-03 | NS       | 0.37     | 8.97E-02 | NS       | 0.30     | 9.19E-02 | NS       | 0.65     | 9.70E-01 | NS       | 0.03     | 9.78E-02 | NS       | 0.03     | 9.78E-02 | NS       | 0.25     | 1.54E-01 | NS       | 0.21  | 1.13E-02 | NS |
| F7H147A        | 8.93E-03   | NS       | 0.51      | 1.97E-02 | NS       | 0.22     | 4.40E-02 | NS       | 0.77     | 9.30E-02 | NS       | 0.44     | 3.49E-01 | NS       | 0.35     | 1.95E-02 | NS       | 0.60     | 2.52E-01 | NS       | 0.59     | 8.54E-03 | NS       | 0.50     | 8.44E-02 | NS       | 0.39     | 1.01E-01 | NS       | 0.69  | 4.55E-01 | NS |
| ADA15Q248      | 1.00E-04   | NS       | 0.68      | 2.45E-01 | NS       | 0.27     | 4.63E-01 | NS       | 0.28     | 5.09E-01 | NS       | 0.27     | 4.78E-01 | NS       | 0.25     | 3.45E-01 | NS       | 0.14     | 3.54E-01 | NS       | 0.75     | 4.65E-01 | NS       | 0.51     | 6.60E-01 | NS       | 0.60     | 1.66E-01 | NS       | 0.66  | 5.69E-01 | NS |
| F7H1D1         | 4.86E-01   | NS       | 0.14      | 9.59E-01 | NS       | -0.16    | 8.36E-01 | NS       | 0.11     | 9.44E-01 | NS       | 0.00     | 4.47E-01 | NS       | 0.13     | 7.74E-01 | NS       | 0.19     | 5.79E-01 | NS       | 0.15     | 5.79E-01 | NS       | 0.11     | 9.52E-01 | NS       | 0.02     | 4.46E-01 | NS       | 0.35  | 5.62E-01 | NS |
| ADA15Q506      | 9.73E-02   | NS       | 0.29      | 1.28E-02 | NS       | 0.52     | 1.50E-02 | NS       | 0.49     | 1.45E-01 | NS       | 0.25     | 8.19E-03 | NS       | 0.61     | 2.82E-01 | NS       | 0.43     | 2.58E-01 | NS       | 0.25     | 1.03E-01 | NS       | 0.48     | 1.53E-02 | NS       | 0.47     | 6.09E-01 | NS       | 0.34  | 6.98E-02 | NS |
| F6V65          | 3.71E-01   | NS       | 0.18      | 3.60E-01 | NS       | -0.24    | 1.39E-01 | NS       | 0.34     | 5.38E-01 | NS       | 0.00     | 7.76E-01 | NS       | 0.13     | 7.35E-01 | NS       | 0.04     | 8.10E-01 | NS       | -0.04    | 7.03E-01 | NS       | -0.05    | 3.40E-01 | NS       | 0.29     | 9.99E-01 | NS       | 0.16  | 7.12E-01 | NS |
| F65SW9         | 9.65E-01   | NS       | 0.00      | 9.26E-01 | NS       | 0.02     | 1.95E-01 | NS       | -0.28    | 4.67E-01 | NS       | -0.17    | 8.20E-01 | NS       | -0.02    | 1.61E-01 | NS       | -0.34    | 9.79E-01 | NS       | 0.07     | 2.75E-02 | NS       | -0.55    | 2.90E-01 | NS       | -0.34    | 5.36E-01 | NS       | -0.13 | 9.07E-01 | NS |
| F7H1V0         | 3.77E-01   | NS       | 0.17      | 1.55E-01 | NS       | 0.19     | 1.17E-01 | NS       | 0.35     | 6.60E-02 | NS       | 0.33     | 4.33E-01 | NS       | 0.20     | 4.44E-03 | NS       | 0.38     | 6.71E-01 | NS       | 0.10     | 6.99E-01 | NS       | 0.10     | 8.93E-01 | NS       | 0.04     | 5.29E-01 | NS       | 0.14  | 1.11E-01 | NS |
| F7H1J2         | 1.70E-02   | NS       | 1.55      | 5.42E-02 | NS       | 2.93     | 8.11E-02 | NS       | 4.18     | 7.50E-02 | NS       | 2.78     | 8.67E-02 | NS       | 1.28     | 4.42E-02 | NS       | 1.53     | 1.01E-02 | NS       | 1.02     | 1.76E-01 | NS       | 3.07     | 5.42E-02 | NS       | 1.39     | 2.29E-01 | NS       | 0.86  | 3.86E-02 | NS |
| F7H2A5         | 1.53E-01   | NS       | 1.15      | 3.41E-01 | NS       | 0.81     | 2.04E-01 | NS       | 1.01     | 6.70E-02 | NS       | 1.33     | 4.42E-01 | NS       | 1.08     | 5.94E-01 | NS       | -0.22    | 5.94E-01 | NS       | 0.14     | 1.45E-01 | NS       | 0.64     | 5.31E-01 | NS       | 0.21     | 2.02E-01 | NS       | -0.21 | 2.43E-01 | NS |
| H9H3P6         | 2.59E-01   | NS       | -0.20     | 8.46E-01 | NS       | -0.04    | 7.84E-01 | NS       | -0.04    | 3.49E-01 | NS       | -0.20    | 7.23E-01 | NS       | -0.06    | 1.07E-01 | NS       | -0.23    | 4.59E-01 | NS       | -0.17    | 3.85E-01 | NS       | -0.18    | 2.27E-01 | NS       | -0.22    | 1.71E-01 | NS       | -0.29 | 4.40E-02 | NS |
| F7H1D8         | 1.20E-04   | NS       | 0.48      | 6.25E-01 | NS       | -0.13    | 6.94E-02 | NS       | 0.49     | 1.82E-01 | NS       | 0.52     | 7.24E-01 | NS       | 0.11     | 1.20E-01 | NS       | 0.07     | 5.94E-01 | NS       | 0.27     | 5.94E-01 | NS       | 0.51     | 2.04E-02 | NS       | 0.34     | 2.36E-01 | NS       | 0.66  | 2.69E-01 | NS |
| ADA15Q500      | 5.72E-01   | NS       | 0.43      | 7.85E-01 | NS       | 0.26     | 3.79E-01 | NS       | 0.81     | 3.13E-01 | NS       | 0.68     | 6.71E-01 | NS       | 0.10     | 5.50E-01 | NS       | 0.55     | 1.52E-01 | NS       | 0.46     | 5.25E-01 | NS       | 0.51     | 3.94E-01 | NS       | 0.31     | 5.35E-01 | NS       | 0.44  | 1.63E-01 | NS |
| F7H1C2         | 1.50E-01   | NS       | -3.07     | 5.80E-01 | NS       | -0.41    | 9.18E-02 | NS       | -3.45    | 1.68E-01 | NS       | -2.82    | 1.85E-01 | NS       | -2.40    | 2.29E-01 | NS       | -2.57    | 3.52E-01 | NS       | -2.21    | 5.90E-01 | NS       | -1.62    | 5.86E-01 | NS       | -0.58    | 2.17E-01 | NS       | -2.68 | 6.29E-01 | NS |
| F7H1F4         | 2.16E-01   | NS       | 0.50      | 9.65E-01 | NS       | -0.05    | 3.20E-01 | NS       | 0.57     | 9.04E-01 | NS       | 0.49     | 9.04E-01 | NS       | 0.20     | 2.88E-01 | NS       | 0.32     | 6.42E-01 | NS       | 0.26     | 5.25E-01 | NS       | 0.33     | 2.72E-01 | NS       | 0.51     | 1.09E-01 | NS       | 0.61  | 6.29E-01 | NS |
| F7H1F8         | 1.03E-02   | NS       | -1.60     | 1.36E-01 | NS       | -0.64    | 5.13E-01 | NS       | -0.21    | 3.33E-01 | NS       | -0.37    | 4.77E-01 | NS       | -0.19    | 5.47E-01 | NS       | -0.23    | 1.79E-01 | NS       | -0.51    | 7.84E-01 | NS       | -0.12    | 1.84E-01 | NS       | -0.63    | 2.65E-01 | NS       | -0.56 | 8.93E-01 | NS |
| F6H58          | 1.91E-01   | NS       | 0.31      | 5.17E-01 | NS       | -0.22    | 1.30E-01 | NS       | 0.43     | 4.83E-01 | NS       | 0.24     | 9.39E-01 | NS       | 0.03     | 4.89E-01 | NS       | 0.26     | 6.41E-01 | NS       | -0.13    | 5.52E-01 | NS       | 0.26     | 8.04E-01 | NS       | 0.34     | 2.23E-01 | NS       | 0.47  | 9.56E-01 | NS |
| ADA15Q507      | 5.00E-01   | NS       | -0.09     | 8.80E-01 | NS       | -0.02    | 6.09E-01 | NS       | 0.16     | 3.89E-01 | NS       | -0.12    | 2.63E-01 | NS       | -0.16    | 9.07E-01 | NS       | 0.04     | 7.74E-01 | NS       | 0.12     | 9.81E-01 | NS       | -0.01    | 4.40E-01 | NS       | -0.01    | 6.56E-01 | NS       | -0.06 | 3.55E-01 | NS |
| F6TP36         | 3.92E-01   | NS       | 0.24      | 2.98E-01 | NS       | -0.19    | 2.80E-01 | NS       | 0.40     | 5.37E-01 | NS       | 0.14     | 6.29E-01 | NS       | -0.09    | 1.69E-01 | NS       | 0.25     | 6.48E-01 | NS       | -0.08    | 8.93E-01 | NS       | 0.01     | 6.17E-01 | NS       | 0.11     | 6.45E-02 | NS       | 0.26  | 8.85E-02 | NS |
| F6Z6R2         | 8.67E-01   | NS       | 0.06      | 9.90E-01 | NS       | -0.39    | 3.07E-01 | NS       | 0.36     | 8.57E-01 | NS       | 0.05     | 9.90E-01 | NS       | 0.03     | 5.54E-01 | NS       | 0.03     | 5.48E-01 | NS       | 0.09     | 1.12E-02 | NS       | 0.03     | 6.73E-01 | NS       | 0.09     | 4.13E-01 | NS       | 0.45  | 9.22E-01 | NS |
| F6V5G1         | 5.94E-01   | NS       | 0.13      | 8.44E-01 | NS       | -0.37    | 2.46E-01 | NS       | 0.57     | 2.94E-01 | NS       | 0.30     | 9.33E-01 | NS       | -0.21    | 3.06E-01 | NS       | 0.76     | 4.47E-01 | NS       | -0.13    | 4.70E-01 | NS       | 0.53     | 7.93E-01 | NS       | 0.09     | 7.53E-01 | NS       | 0.11  | 3.37E-01 | NS |
| F7H1F6         | 9.45E-01   | NS       | 0.03      | 8.01E-01 | NS       | -0.04    | 8.83E-02 | NS       | 0.37     | 6.56E-01 | NS       | -0.11    | 9.78E-01 | NS       | 0.12     | 3.36E-01 | NS       | 0.14     | 1.94E-01 | NS       | 0.29     | 6.47E-01 | NS       | 0.45     | 6.94E-01 | NS       | 0.10     | 1.36E-01 | NS       | 0.27  | 8.86E-01 | NS |
| F7H1S6         | 2.31E-01   | NS       | 0.97      | 4.97E-01 | NS       | 0.77     | 1.09E-01 | NS       | 1.56     | 7.22E-01 | NS       | 0.96     | 7.21E-01 | NS       | 0.98     | 3.68E-01 | NS       | 0.40     | 4.29E-01 | NS       | 0.34     | 9.11E-01 | NS       | -0.01    | 8.80E-01 | NS       | 0.34     | 3.89E-01 | NS       | -0.29 | 7.32E-01 | NS |
| ADA15R0L5      | 4.76E-01   | NS       | 0.13      | 2.61E-01 | NS       | -0.04    | 2.42E-01 | NS       | 0.75     | 8.89E-01 | NS       | 0.49     | 2.91E-01 | NS       | -0.09    | 1.84E-01 | NS       | 0.55     | 3.12E-01 | NS       | 0.27     | 6.35E-01 | NS       | -0.39    | 3.03E-01 | NS       | 0.45     | 4.94E-02 | NS       | 0.58  | 7.80E-01 | NS |
| F7H1B4         | 5.94E-01   | NS       | 0.71      | 2.51E-01 | NS       | 0.92     | 7.44E-02 | NS       | 1.21     | 4.87E-01 | NS       | 0.86     | 2.93E-01 | NS       | 0.96     | 7.68E-01 | NS       | 1.04     | 7.32E-01 | NS       | -0.02    | 6.92E-01 | NS       | 0.82     | 8.71E-01 | NS       | 0.24     | 5.05E-01 | NS       | 0.16  | 5.70E-01 | NS |
| F6V1P9         | 1.06E-01   | NS       | -0.15     | 9.47E-01 | NS       | -0.01    | 4.98E-01 | NS       | 0.38     | 4.15E-01 | NS       | 0.38     | 4.15E-01 | NS       | 0.13     | 8.51E-01 | NS       | 0.03     | 6.19E-01 | NS       | 0.15     | 3.48E-01 | NS       | 0.15     | 3.48E-01 | NS       | 0.58     | 9.12E-02 | NS       | 0.48  | 3.63E-01 | NS |
| F7H1G4         | 4.65E-01   | NS       | -0.23     | 6.00E-01 | NS       | -0.16    | 1.45E-01 | NS       | -0.51    | 2.65E-01 | NS       | -0.07    | 3.34E-01 | NS       | -0.29    | 6.68E-01 | NS       | -0.04    | 2.28E-01 | NS       | 0.07     | 1.02E-01 | NS       | 0.07     | 1.02E-01 | NS       | 0.44     | 6.65E-01 | NS       | -0.15 | 2.82E-01 | NS |
| ADA15Q501      | 1.94E-01   | NS       | 0.45      | 3.71E-01 | NS       | -0.23    | 6.35E-02 | NS       | 0.65     | 3.29E-01 | NS       | 0.44     | 7.70E-01 | NS       | -0.07    | 2.41E-01 | NS       | 0.40     | 9.18E-01 | NS       | 0.11     | 2.87E-01 | NS       | 0.11     | 2.68E-01 | NS       | 0.49     | 4.06E-02 | NS       | 0.55  | 6.46E-01 | NS |
| F6Z2Z          | 5.76E-01   | NS       | -0.08     | 9.91E-01 | NS       | 0.02     | 1.79E-01 | NS       | -0.20    | 7.71E-01 | NS       | -0.03    | 6.47E-01 | NS       | 0.20     | 6.85E-01 | NS       | -0.05    | 8.15E-01 | NS       | -0.02    | 5.80E-01 | NS       | 0.09     | 7.09E-01 | NS       | 0.11     | 2.71E-01 | NS       | -0.20 | 1.47E-01 | NS |
| F7H1V3         | 2.07E-01   | NS       | 0.48      | 8.42E-01 | NS       | -0.02    | 2.02E-01 | NS       | 0.39     | 3.55E-01 | NS       | 0.30     | 8.46E-01 | NS       | 0.11     | 2.89E-01 | NS       | 0.05     | 4.40E-01 | NS       | 0.27     | 3.85E-01 | NS       | 0.50     | 5.92E-02 | NS       | 0.63     | 9.99E-02 | NS       | 0.61  | 5.41E-01 | NS |
| H9H1V9         | 9.45E-01   |          |           |          |          |          |          |          |          |          |          |          |          |          |          |          |          |          |          |          |          |          |          |          |          |          |          |          |          |       |          |    |

Supplementary table 6

| name           | 0.25 h/Pre |          | 0.5 h/Pre |          | 1 h/Pre  |          | 2 h/Pre  |          | 4 h/Pre  |          | 8 h/Pre  |          | 16 h/Pre |          | 1 d/Pre  |          | 2 d/Pre  |          | 3 d/Pre  |          | 7 d/Pre  |          | 14 d/Pre |          | 21 d/Pre |          |          |          |    |       |
|----------------|------------|----------|-----------|----------|----------|----------|----------|----------|----------|----------|----------|----------|----------|----------|----------|----------|----------|----------|----------|----------|----------|----------|----------|----------|----------|----------|----------|----------|----|-------|
|                | p-value    | FDR      | log2(FC)  | p-value  | log2(FC) | p-value  | log2(FC) | p-value  | log2(FC) | p-value  | log2(FC) | p-value  | log2(FC) | p-value  | log2(FC) | p-value  | log2(FC) | p-value  | log2(FC) | p-value  | log2(FC) | p-value  | log2(FC) | p-value  | log2(FC) | p-value  | log2(FC) |          |    |       |
| XGAP6          | 6.34E-04   | NS       | 3.24      | 2.86E-05 | NS       | 3.58     | 4.84E-06 | NS       | 3.57     | 8.81E-03 | NS       | 2.52     | 2.41E-02 | NS       | 1.29     | 1.73E-01 | NS       | 0.97     | 6.90E-01 | NS       | 0.52     | 9.33E-02 | NS       | 0.17     | 4.47E-01 | NS       | 1.96     |          |    |       |
| IL3L5P         | 6.61E-04   | NS       | -0.91     | 2.81E-03 | NS       | 0.93     | 3.67E-05 | NS       | 0.97     | 2.18E-02 | NS       | 0.93     | 4.51E-02 | NS       | 0.95     | 9.26E-01 | NS       | 0.97     | 7.11E-04 | NS       | 0.78     | 1.94E-01 | NS       | 0.69     | 6.42E-01 | NS       | 1.35     |          |    |       |
| Q5SG6          | 1.72E-04   | NS       | 2.48      | 2.21E-03 | NS       | 2.98     | 2.92E-04 | NS       | 3.17     | 1.12E-03 | NS       | 1.77     | 1.77E-02 | NS       | 0.81     | 5.14E-04 | NS       | 0.88     | 1.47E-02 | NS       | 2.03     | 2.71E-01 | NS       | 0.23     | 6.03E-01 | NS       | 1.11     |          |    |       |
| 2.98E-04       | NS         | 2.90     | 1.67E-04  | NS       | 2.57     | 2.26E-03 | NS       | 2.32     | 4.67E-03 | NS       | 2.58     | 6.00E-03 | NS       | 0.94     | 2.11E-02 | NS       | 0.90     | 2.10E-01 | NS       | 0.56     | 8.99E-01 | NS       | 0.28     | 1.76E-01 | NS       | 0.98     |          |          |    |       |
| F2M35          | 5.49E-02   | NS       | -0.40     | 1.75E-02 | NS       | -0.36    | 1.62E-02 | NS       | -0.46    | 3.32E-01 | NS       | -0.16    | 2.87E-01 | NS       | -0.17    | 7.49E-02 | NS       | -0.37    | 8.54E-01 | NS       | 0.09     | 7.42E-01 | NS       | 0.04     | 3.56E-01 | NS       | -0.31    |          |    |       |
| R3C76          | 8.40E-03   | NS       | 2.69      | 3.28E-03 | NS       | 3.06     | 4.97E-04 | NS       | 3.12     | 5.59E-03 | NS       | 2.00     | 2.34E-01 | NS       | 0.65     | 1.02E-01 | NS       | 2.02     | 1.40E-01 | NS       | 2.02     | 1.40E-01 | NS       | 2.46     | 2.50E-01 | NS       | 1.90     |          |    |       |
| ASPL2          | 3.27E-02   | NS       | 0.73      | 5.68E-02 | NS       | 0.79     | 1.11E-03 | NS       | 1.17     | 7.81E-01 | NS       | 0.25     | 2.87E-01 | NS       | 0.73     | 1.52E-01 | NS       | 0.67     | 7.99E-02 | NS       | 0.79     | 5.17E-01 | NS       | 0.30     | 8.66E-02 | NS       | 0.47     |          |    |       |
| DORN1          | 3.00E-01   | NS       | 1.58      | 2.63E-03 | NS       | 1.89     | 3.89E-02 | NS       | 1.11     | 6.29E-01 | NS       | 1.22     | 3.97E-01 | NS       | 0.52     | 1.08E-01 | NS       | -0.37    | 2.40E-02 | NS       | 1.33     | 3.14E-01 | NS       | 0.54     | 7.45E-02 | NS       | 0.37     |          |    |       |
| FRW876         | 1.73E-01   | NS       | 0.43      | 4.55E-03 | NS       | 0.42     | 7.86E-03 | NS       | 0.73     | 3.28E-01 | NS       | 0.38     | 1.64E-01 | NS       | 0.27     | 7.19E-02 | NS       | 0.38     | 6.53E-01 | NS       | 0.18     | 9.16E-01 | NS       | 0.22     | 3.15E-01 | NS       | 0.24     |          |    |       |
| Q5JH26         | 5.93E-02   | NS       | -0.74     | 7.68E-02 | NS       | -0.71    | 5.96E-02 | NS       | -0.76    | 1.26E-01 | NS       | -0.53    | 5.12E-01 | NS       | -0.04    | 1.91E-01 | NS       | -0.51    | 1.98E-01 | NS       | 0.29     | 6.92E-01 | NS       | 0.14     | 4.65E-01 | NS       | -0.19    |          |    |       |
| V9HW59         | 1.32E-02   | NS       | 1.21      | 9.29E-03 | NS       | 1.45     | 2.66E-02 | NS       | 1.98     | 4.13E-01 | NS       | 0.76     | 1.80E-02 | NS       | 0.99     | 2.10E-01 | NS       | 1.29     | 6.95E-01 | NS       | 1.52     | 3.55E-01 | NS       | 0.28     | 6.51E-01 | NS       | 0.47     |          |    |       |
| AD0D13         | 8.62E-01   | NS       | -0.01     | 6.26E-01 | NS       | -0.07    | 1.06E-01 | NS       | 0.72     | 7.70E-01 | NS       | -0.05    | 2.93E-01 | NS       | -0.26    | 1.47E-01 | NS       | 0.05     | 9.35E-01 | NS       | 0.16     | 4.44E-01 | NS       | -0.07    | 5.47E-01 | NS       | -0.14    |          |    |       |
| B7255          | 8.44E-01   | NS       | 0.06      | 8.41E-01 | NS       | 0.08     | 2.17E-02 | NS       | 0.54     | 9.40E-01 | NS       | 0.06     | 8.39E-01 | NS       | -0.03    | 9.99E-02 | NS       | 0.20     | 4.30E-01 | NS       | 0.03     | 4.83E-01 | NS       | 0.15     | 3.88E-01 | NS       | 0.24     |          |    |       |
| FRW616         | 2.58E-01   | NS       | 0.49      | 4.43E-01 | NS       | 0.62     | 2.44E-01 | NS       | 0.54     | 9.44E-02 | NS       | 0.91     | 2.94E-01 | NS       | 0.83     | 4.42E-01 | NS       | 0.67     | 2.32E-01 | NS       | 0.81     | 5.59E-03 | NS       | 1.01     | 9.45E-01 | NS       | 0.49     |          |    |       |
| BLP58          | 3.08E-01   | NS       | 0.25      | 7.01E-01 | NS       | 0.18     | 3.87E-03 | NS       | 0.47     | 8.29E-01 | NS       | 0.13     | 9.08E-01 | NS       | 0.02     | 1.05E-01 | NS       | 0.37     | 9.91E-01 | NS       | 0.41     | 3.66E-01 | NS       | 0.41     | 4.28E-01 | NS       | 0.10     |          |    |       |
| Q5JH37         | 1.02E-01   | NS       | -0.68     | 4.56E-01 | NS       | -0.30    | 3.24E-01 | NS       | -0.53    | 2.38E-01 | NS       | -0.11    | 3.81E-01 | NS       | -0.38    | 8.16E-01 | NS       | -0.25    | 3.62E-01 | NS       | 1.36     | 5.72E-01 | NS       | -0.41    | 1.53E-01 | NS       | -0.64    |          |    |       |
| V9HW88         | 6.32E-01   | NS       | 0.03      | 3.74E-01 | NS       | 0.16     | 4.90E-02 | NS       | 0.52     | 8.65E-01 | NS       | -0.02    | 2.57E-01 | NS       | 0.22     | 3.44E-01 | NS       | 0.27     | 2.26E-01 | NS       | 0.01     | 7.81E-01 | NS       | -0.01    | 2.26E-01 | NS       | 0.23     |          |    |       |
| H3B9J          | 6.77E-01   | NS       | -0.40     | 8.59E-01 | NS       | 0.14     | 1.30E-01 | NS       | 1.26     | 9.29E-01 | NS       | -0.04    | 3.69E-01 | NS       | 0.16     | 5.62E-01 | NS       | 0.30     | 1.63E-01 | NS       | 0.42     | 9.22E-01 | NS       | 0.01     | 6.54E-01 | NS       | -0.14    |          |    |       |
| D6R94          | 8.87E-01   | NS       | -0.04     | 8.01E-01 | NS       | -0.09    | 7.98E-01 | NS       | 0.46     | 2.45E-01 | NS       | -0.36    | 8.80E-01 | NS       | -0.05    | 5.14E-01 | NS       | -0.03    | 6.34E-01 | NS       | -0.08    | 8.59E-01 | NS       | -0.07    | 2.00E-01 | NS       | 0.57     |          |    |       |
| B2R39          | 2.30E-01   | NS       | -1.51     | 3.50E-01 | NS       | -1.29    | 6.63E-01 | NS       | -0.76    | 9.78E-01 | NS       | -0.21    | 2.00E-01 | NS       | -1.58    | 3.68E-01 | NS       | 0.07     | 6.77E-01 | NS       | -0.95    | 2.18E-01 | NS       | 0.39     | 6.01E-01 | NS       | -1.22    |          |    |       |
| L8E83          | 7.06E-01   | NS       | 0.14      | 2.79E-01 | NS       | 0.29     | 1.39E-01 | NS       | 0.86     | 2.41E-01 | NS       | 0.51     | 1.10E-01 | NS       | 0.51     | 3.53E-01 | NS       | 0.28     | 9.15E-01 | NS       | 0.28     | 1.74E-01 | NS       | 0.25     | 3.68E-01 | NS       | 0.27     |          |    |       |
| 4.14E-01       | NS         | -0.39    | 3.18E-01  | NS       | -0.45    | 6.37E-01 | NS       | -0.09    | 4.03E-01 | NS       | -0.39    | 9.77E-01 | NS       | -0.39    | 9.77E-01 | NS       | -0.15    | 4.74E-01 | NS       | 0.04     | 4.89E-01 | NS       | -0.34    | 9.12E-01 | NS       | -0.42    |          |          |    |       |
| 1.78E-02       | NS         | -0.41    | 3.49E-02  | NS       | -0.45    | 1.09E-01 | NS       | -0.46    | 8.65E-02 | NS       | -0.33    | 9.60E-02 | NS       | -0.31    | 8.90E-02 | NS       | -0.35    | 3.92E-02 | NS       | -0.44    | 7.16E-02 | NS       | -0.28    | 2.73E-02 | NS       | -0.46    |          |          |    |       |
| B72549         | 0.04       | 7.44E-01 | NS        | 0.09     | 3.19E-02 | NS       | 0.45     | 4.84E-01 | NS       | 0.25     | 6.24E-01 | NS       | 0.27     | 6.47E-01 | NS       | 0.37     | 9.91E-01 | NS       | 0.05     | 9.18E-01 | NS       | 0.00     | 7.71E-01 | NS       | 0.11     | 1.16E-01 | NS       | -0.21    |    |       |
| AD0A2R001      | 7.04E-02   | NS       | 0.13      | 4.52E-01 | NS       | 0.32     | 2.67E-01 | NS       | 0.43     | 4.96E-01 | NS       | -0.35    | 9.78E-01 | NS       | -0.07    | 6.47E-01 | NS       | 0.38     | 8.40E-01 | NS       | 0.23     | 3.81E-01 | NS       | 0.25     | 4.99E-01 | NS       | 0.58     |          |    |       |
| AD0A7W5V5      | 5.37E-01   | NS       | 0.14      | 9.96E-01 | NS       | 0.01     | 5.69E-01 | NS       | 0.14     | 2.86E-01 | NS       | 0.22     | 3.56E-01 | NS       | 0.12     | 2.90E-01 | NS       | 0.04     | 6.72E-01 | NS       | 0.05     | 9.79E-01 | NS       | -0.07    | 3.62E-01 | NS       | 0.16     |          |    |       |
| 7.19E-01       | NS         | -0.05    | 6.89E-01  | NS       | -0.05    | 8.71E-02 | NS       | -0.30    | 6.32E-01 | NS       | -0.08    | 9.23E-01 | NS       | 0.01     | 1.28E-02 | NS       | -0.40    | 1.99E-01 | NS       | -0.22    | 2.97E-01 | NS       | -0.17    | 1.87E-01 | NS       | -0.28    |          |          |    |       |
| B72R8          | 1.05E-01   | NS       | 0.35      | 6.09E-02 | NS       | 0.42     | 5.23E-02 | NS       | 0.39     | 3.67E-01 | NS       | 0.24     | 1.25E-01 | NS       | 0.34     | 4.72E-01 | NS       | 0.30     | 3.29E-01 | NS       | 0.23     | 7.20E-01 | NS       | 0.07     | 7.51E-01 | NS       | 0.10     |          |    |       |
| Q5JG52         | 3.78E-01   | NS       | -0.13     | 2.54E-01 | NS       | -0.17    | 4.66E-02 | NS       | -0.26    | 9.40E-01 | NS       | -0.02    | 3.44E-01 | NS       | -0.14    | 2.99E-02 | NS       | -0.37    | 3.81E-01 | NS       | -0.33    | 3.81E-01 | NS       | -0.33    | 8.20E-02 | NS       | -0.22    |          |    |       |
| Q5JY21         | 9.76E-01   | NS       | 0.05      | 8.61E-01 | NS       | -0.07    | 2.06E-01 | NS       | -0.35    | 2.67E-01 | NS       | -0.22    | 8.66E-01 | NS       | -0.07    | 2.19E-01 | NS       | -0.30    | 3.34E-01 | NS       | -0.52    | 1.97E-01 | NS       | -0.08    | 2.64E-01 | NS       | -0.44    |          |    |       |
| J3O68          | 3.58E-01   | NS       | 0.02      | 3.60E-01 | NS       | -0.28    | 1.88E-01 | NS       | -0.76    | 2.66E-01 | NS       | -0.58    | 3.41E-01 | NS       | -0.66    | 1.07E-01 | NS       | -0.68    | 9.92E-02 | NS       | -0.81    | 5.99E-01 | NS       | 0.23     | 3.37E-01 | NS       | -0.35    |          |    |       |
| V9HW33         | 6.22E-01   | NS       | 0.24      | 4.44E-01 | NS       | 0.89     | 9.50E-01 | NS       | 0.25     | 2.46E-01 | NS       | 0.45     | 1.78E-02 | NS       | 0.83     | 8.94E-02 | NS       | 0.55     | 7.25E-01 | NS       | 0.17     | 8.43E-01 | NS       | 0.47     | 9.35E-01 | NS       | 0.29     |          |    |       |
| B4Y1C          | 3.34E-01   | NS       | -0.17     | 1.05E-01 | NS       | -0.30    | 1.68E-01 | NS       | -0.25    | 3.91E-01 | NS       | -0.14    | 8.14E-01 | NS       | -0.01    | 2.76E-01 | NS       | -0.19    | 1.78E-01 | NS       | -0.25    | 4.42E-01 | NS       | -0.47    | 2.49E-01 | NS       | -0.38    |          |    |       |
| AD0A87W4V3     | 9.16E-01   | NS       | 0.13      | 5.63E-01 | NS       | 0.12     | 3.86E-01 | NS       | 0.51     | 3.98E-01 | NS       | 0.34     | 4.88E-01 | NS       | 0.20     | 1.68E-01 | NS       | 0.20     | 1.68E-01 | NS       | 0.20     | 1.68E-01 | NS       | 0.20     | 1.68E-01 | NS       | 0.20     | 1.68E-01 | NS | 0.20  |
| AD0A11R20      | 1.75E-01   | NS       | -0.29     | 4.59E-01 | NS       | -0.10    | 2.42E-01 | NS       | -0.25    | 1.80E-01 | NS       | -0.29    | 2.50E-01 | NS       | -0.23    | 3.51E-01 | NS       | -0.08    | 3.73E-01 | NS       | -0.17    | 6.14E-01 | NS       | -0.06    | 2.35E-01 | NS       | -0.25    | 6.00E-02 | NS | -0.40 |
| E9PH0          | 4.02E-01   | NS       | -0.16     | 5.48E-01 | NS       | -0.14    | 3.15E-01 | NS       | -0.21    | 5.23E-01 | NS       | -0.13    | 4.50E-01 | NS       | -0.03    | 7.55E-01 | NS       | 0.01     | 9.23E-01 | NS       | 0.08     | 8.78E-01 | NS       | 0.04     | 7.51E-01 | NS       | -0.05    | 2.48E-01 | NS | -0.22 |
| D3DNM4         | 2.97E-01   | NS       | 0.16      | 1.68E-01 | NS       | 0.06     | 3.88E-02 | NS       | 1.03     | 9.32E-01 | NS       | 0.43     | 7.57E-01 | NS       | -0.37    | 2.61E-01 | NS       | 0.71     | 4.00E-01 | NS       | 0.63     | 8.56E-01 | NS       | -0.01    | 2.70E-01 | NS       | 0.91     |          |    |       |
| Q29R5          | 0.06       | 4.45E-01 | NS        | 0.28     | 4.38E-01 | NS       | -0.09    | 9.14E-01 | NS       | 0.14     | 8.12E-01 | NS       | 0.08     | 3.40E-01 | NS       | 0.20     | 4.46E-01 | NS       | -0.14    | 4.42E-01 | NS       | 0.24     | 3.90E-01 | NS       | 0.24     | 3.90E-01 | NS       | 0.19     |    |       |
| AD0A5Z2D35     | 2.93E-01   | NS       | 0.33      | 4.02E-01 | NS       | 0.30     | 3.59E-01 | NS       | 0.39     | 9.27E-01 | NS       | 0.12     | 5.22E-01 | NS       | -0.17    | 2.97E-01 | NS       | 0.58     | 8.50E-01 | NS       | 1.05     | 9.92E-01 | NS       | 0.68     | 1.10E-01 | NS       | 0.85     |          |    |       |
| RT-Cal protein | 7.33E-01   | NS       | -0.03     | 3.28E-01 | NS       | -0.02    | 3.88E-01 | NS       | -0.08    | 3.17E-01 | NS       | 0.08     | 6.98E-01 | NS       | -0.03    | 7.05E-01 | NS       | -0.03    | 4.46E-02 | NS       | -0.26    | 2.54E-01 | NS       | -0.08    | 9.87E-01 | NS       | 0.00     |          |    |       |
| B4Y1C          | 7.37E-01   | NS       | 0.29      | 2.68E-02 | NS       | 0.91     | 2.20E-01 | NS       | 0.63     | 7.68E-02 | NS       | 0.73     | 2.10E-02 | NS       | 1.91     | 5.08E-03 | NS       | 1.61     | 8.38E-04 | NS       | 2.07     | 8.18E-03 | NS       | 1.42     | 1.18E-01 | NS       | 0.79     |          |    |       |
| AD0A14V0X0     | 5.84E-01   | NS       | -0.10     | 4.24E-01 | NS       | -0.14    | 2.42E-01 | NS       | -0.25    | 1.80E-01 | NS       | -0.29    | 2.50E-01 | NS       | -0.23    | 3.51E-01 | NS       | -0.08    | 3.73E-01 | NS       | -0.17    | 6.14E-01 | NS       | -0.06    | 2.35E-01 | NS       | -0.25    | 6.00E-02 | NS | -0.40 |
| AD0A14V0J17    | 2.67E-01   | NS       | -0.32     | 3.59E-01 | NS       | -0.28    | 2.40E-01 | NS       | -0.33    | 2.18E-01 | NS       | -0.35    | 2.70E-01 | NS       | -0.34    | 1.97E-01 | NS       | -0.38    | 5.95E-01 | NS       | -0.40    | 1.62E-01 | NS       | -0.41    | 5.88E-01 | NS       | -0.20    | 4.34E-01 | NS | -0.15 |
| AD0A24A7       | 3.68E-01   | NS       | -0.23     | 3.95E-01 | NS       | -0.22    | 8.53E-01 | NS       | -0.05    | 3.31E-01 | NS       | -0.25    | 7.27E-01 | NS       | -0.10    | 8.08E-01 | NS       | -0.05    | 2.52E-01 | NS       | -0.28    | 3.27E-01 | NS       | -0.21    | 7.05E-01 | NS       | 0.09     |          |    |       |
| B9S79          | 9.84E-01   | NS       | -0.02     | 7.31E-01 | NS       | -0.07    | 1.58E-01 | NS       | 0.27     | 7.85E-01 |          |          |          |          |          |          |          |          |          |          |          |          |          |          |          |          |          |          |    |       |
